# Supplementary material for: Integrated Analysis of Long Non-coding RNAs (LncRNAs) and mRNA Expression Profiles Reveals the Potential Role of LncRNAs in Skeletal Muscle Development of the Chicken
Source: Front Physiol. 2017 Jan 9;7:687. doi: 10.3389/fphys.2016.00687 (PMC5220077; doi:10.3389/fphys.2016.00687)
Supplement: Supplementary file 6 [file Table6.XLSX]

## Sheet: exp_significant_mRNA E16 vs P1
Table S6. Differential expression analysis of mRNAs in E16 chicken compared with D1 chicken.
Gene	Locus	Value(E16)	Value(D1)	log2(fold change)	q value
ZWILCH	10:18005979-18015614	13.766	4.98862	-1.4644	0.00214311
ZRANB3	7:30024236-30054671	3.37491	1.25912	-1.42244	0.029463
ZNF706	2:128505589-128507895	8.65123	18.4762	1.09469	0.029463
ZNF395	3:105294829-105304932	8.28519	2.10069	-1.97967	0.00118002
ZNF385D	2:36832211-36992407	18.4549	43.7921	1.24667	0.00371511
ZNF385B	7:14343681-14477554	11.0957	0.925047	-3.58434	0.00118002
ZFAND6	10:12074414-12122886	17.2107	36.9883	1.10376	0.0303998
ZC2HC1A	2:120046076-120067038	25.5708	8.28613	-1.62573	0.00118002
ZBTB20	1:82324876-82353182	6.81265	18.8303	1.46677	0.00118002
YIPF7	4:67246401-67261250	5.75869	17.3705	1.59282	0.00118002
WWP1	2:122849872-122909935	35.8499	81.209	1.17967	0.00118002
WNT5A	12:7892862-7904972	4.82562	13.2281	1.45482	0.00702696
WIPF1	7:16313905-16361739	16.7752	7.14786	-1.23075	0.00443086
WFS1	4:79065636-79098558	16.7814	36.4874	1.12053	0.0104667
WDHD1	5:56186424-56224761	5.02232	0.784348	-2.67879	0.0109831
VWF	1:74338878-74476749	13.9637	51.4005	1.8801	0.00118002
VWA8	1:165302185-165480795	12.1131	56.0068	2.20903	0.00118002
VWA3A	14:8572310-8598514	10.7875	1.01548	-3.40912	0.00118002
VSTM4	6:18108252-18138740	9.59368	2.29893	-2.06112	0.00214311
VPAC2	2:9612722-9663652	3.39131	8.99935	1.40798	0.0228282
VOPP1	2:52265212-52336191	1.16574	5.39668	2.21083	0.0456743
VDAC2	6:14411230-14417212	212.813	525.441	1.30394	0.0076143
VDAC1	13:15352638-15367400	82.6989	270.03	1.70718	0.00118002
VASH2	3:21083662-21110352	91.2054	22.6024	-2.01265	0.00118002
VAPB	20:11526394-11539165	78.0727	196.979	1.33515	0.00118002
UTS2R	18:3633807-3634956	1.52791	10.9453	2.84068	0.00296991
USP13	9:16861501-16902461	70.4434	208.725	1.56707	0.00118002
USMG5	6:23133667-23148454	38.4465	114	1.56811	0.00296991
UQCRH	8:20498969-20500444	359.74	842.335	1.22744	0.00702696
UQCRC2	14:15085439-15096857	212.535	504.045	1.24585	0.015395
UQCRC1	12:9046000-9054965	142.516	458.873	1.68697	0.00118002
UQCR10	15:11034184-11035607	221.315	837.781	1.92047	0.00118002
ULK2	19:6807396-6843139	18.7731	40.3718	1.10468	0.00998534
ULK1	15:2622865-2693253	4.58399	21.1236	2.20418	0.00118002
UHMK1	8:3809069-3821391	4.98989	11.8774	1.25114	0.00512235
UGP2	3:9438435-9460691	40.906	224.769	2.45806	0.00118002
UCKL1	20:9836524-9851741	2.98507	10.7378	1.84686	0.00214311
UBXN2A	3:103726225-103743260	20.889	50.4642	1.27251	0.00296991
UBE2D1	6:4700547-4716284	48.1603	114.046	1.2437	0.00371511
UBE2C	20:10853788-10854730	30.543	5.05974	-2.59371	0.00371511
UBE2B	13:15177673-15182933	25.9114	86.4168	1.73773	0.00118002
UAP1L1	17:355264-371182	10.5689	4.71371	-1.16489	0.0478467
UACA	10:19102912-19118345	36.3049	13.7763	-1.39798	0.00214311
TYMS	2:101603490-101612231	12.9316	2.77539	-2.22014	0.00118002
TXNRD3	12:10366875-10387808	23.6094	51.4252	1.12311	0.0114831
TXNDC16	5:58026412-58072476	2.94069	1.36571	-1.10651	0.0420677
TXN2	1:51573279-51580672	70.7761	155.021	1.13113	0.0076143
TUBB6	2:97121785-97131304	31.2114	12.6086	-1.30767	0.00118002
TUBB2B	2:66367677-66370171	13.8897	2.54816	-2.44649	0.00118002
TUBB1	20:11232024-11237042	7.55657	3.39605	-1.15388	0.0391645
TUBAL3	1:1149163-1155872	64.4785	10.9019	-2.56424	0.00118002
TTYH3	14:3242658-3274038	39.5018	17.3708	-1.18526	0.00702696
TTYH2	18:9384971-9391147	5.96671	1.12707	-2.40436	0.00214311
TTPA	2:113502154-113517713	1.43686	10.51	2.87077	0.00118002
TTLL7	8:15685995-15715330	12.3767	41.0479	1.72969	0.00118002
TTK	3:78612133-78643792	7.40556	1.5016	-2.30211	0.00118002
TSPAN13	2:28666793-28695196	1.44375	8.35387	2.53263	0.00118002
TSC22D3	4:1770826-1772689	23.0351	76.4534	1.73074	0.00118002
TRMT10A	4:59624812-59633939	26.1805	9.8897	-1.40449	0.00443086
TRIP13	2:55637321-55652172	4.31437	0.800262	-2.43061	0.0076143
TRIM7.1	16:177446-186760	12.184	26.9655	1.14613	0.0190384
TRIM2	4:19316593-19349626	8.98409	26.2803	1.54853	0.00118002
TRIB1	2:138436989-138444511	3.35173	12.5814	1.90832	0.0104667
TRDN	3:60315840-60432093	164.488	383.835	1.22251	0.0144396
TRAK1	2:44326507-44408536	23.744	51.7052	1.12275	0.0120027
TRAIP	12:2549853-2567887	2.37119	0.436614	-2.44118	0.0140201
TRAF-5	3:21605814-21621949	0.958099	0.20082	-2.25427	0.0375131
TPX2	20:10382092-10392964	20.7989	5.83604	-1.83345	0.00118002
TPX2	20:10382092-10392964	5.87036	1.69008	-1.79636	0.0320609
TPPP3	11:1213865-1215689	14.3811	83.8035	2.54284	0.00118002
TPD52L1	3:59527858-59580356	1.66961	0.269807	-2.62951	0.0207099
TOX	2:111851188-112118120	4.45683	1.48411	-1.58642	0.00443086
TOMM20	3:37533437-37541244	68.7318	148.561	1.11201	0.00880977
TOM1	1:51962484-51983162	11.6681	36.5299	1.6465	0.00118002
TOB2	1:49497082-49503880	9.7117	38.9328	2.00319	0.00118002
TOB	18:10354078-10355879	60.2944	139.627	1.21148	0.0140201
TNFRSF21	3:109558089-109588428	2.47021	6.10635	1.30568	0.00938095
TNFRSF19	1:176744135-176784712	19.9437	5.33107	-1.90344	0.00443086
TNFRSF11A	2:68296154-68319337	3.2858	6.95481	1.08177	0.0256038
TNFAIP8L3	10:8648403-8687755	12.3725	3.9104	-1.66175	0.0104667
TMPO	1:46488736-46510905	137.92	59.8391	-1.20467	0.0114831
TMEM8C	17:6958312-6965254	4.58338	0.508595	-3.17182	0.0140201
TMEM59	8:24030292-24038522	31.4125	64.7293	1.04308	0.0163146
TMEM52	21:1907153-1910578	12.9674	36.9222	1.5096	0.00214311
TMEM45A	1:84325489-84334210	3.93122	1.23515	-1.6703	0.0109831
TMEM229B	5:28024056-28028770	1.77344	4.89528	1.46484	0.0109831
TMEM200A	3:57238295-57239765	18.7796	5.97177	-1.65294	0.00118002
TMEM182	1:133408226-133435369	75.9836	201.39	1.40623	0.0135617
TMEM169	7:23051838-23066402	12.1424	3.13788	-1.95219	0.00118002
TMEM132B	15:4260706-4396975	1.7129	0.481418	-1.83108	0.03015
TMEM120A	19:4304086-4327912	6.48648	26.2346	2.01596	0.0271484
TMEM108	2:43178585-43193963	4.79638	1.05207	-2.18872	0.0167542
TMCC3	1:45037003-45076411	3.49189	13.5939	1.96088	0.00118002
TM6SF1	10:10715837-10735473	14.8683	45.1062	1.60109	0.00118002
TLL2	6:16142743-16223667	2.0222	0.437004	-2.2102	0.0076143
TLL1	4:23520462-23656666	1.47293	4.37813	1.57163	0.00214311
TKT	12:6937216-6960127	15.2292	6.30509	-1.27225	0.0144396
TK1	18:10142946-10144362	9.6271	2.76444	-1.80011	0.0476637
TINAG	3:87275062-87319001	4.52094	13.5302	1.58149	0.00443086
TIGAR	1:73271525-73291016	13.1626	70.2023	2.41507	0.00118002
TICRR	10:12331066-12347214	3.34481	0.995181	-1.74889	0.00512235
THNSL1	2:16606745-16608950	18.0459	6.25457	-1.52869	0.00371511
THBS2	3:40680693-40713177	56.8152	16.992	-1.74142	0.00118002
THBS1	5:28899074-29127124	4.87271	80.2495	4.0417	0.00118002
TGFB3	5:37739713-37747666	96.0853	36.6053	-1.39226	0.00118002
TG	2:141333053-141469306	1.12314	0.261284	-2.10384	0.0309761
TFRC	9:14408399-14421691	33.8608	79.0533	1.22321	0.00641661
TFCP2L1	7:25539596-25568408	6.30396	0.374682	-4.07252	0.00512235
TFB2M	3:33272349-33280477	8.73567	25.6101	1.55172	0.00118002
TET2	4:38256306-38277565	15.5883	36.316	1.22014	0.0239204
TENM2	13:4187412-4738485	1.73507	0.525756	-1.72252	0.00371511
TEF	1:49520861-49536052	44.3746	116.818	1.39646	0.00118002
TECR	8:12604681-12696378	6.07359	2.69835	-1.17047	0.0274941
TDRD12	11:9402910-9424291	1.20824	0.186581	-2.69503	0.015395
TDP1	5:42892401-42988286	2.2387	0.872334	-1.35971	0.044125
TCP11L2	1:53843799-53857446	13.2855	56.7977	2.09597	0.00118002
TCN2	15:10781347-10783629	1.56077	5.2249	1.74314	0.03015
TCAIM	2:41194188-41210712	14.2402	32.6866	1.19874	0.0150256
TBRG4	2:3989631-3999814	3.19287	6.69776	1.06882	0.0391645
TAGAP	3:51494687-51502392	1.50481	0.297418	-2.33901	0.0303998
TACC3	4:83450303-83469111	36.5481	16.3107	-1.16398	0.00641661
SYNPO2L	6:15537986-15569127	39.2281	137.798	1.8126	0.00118002
SYNM	10:16360038-16376937	35.1447	77.0554	1.13259	0.0130279
SYNJ2	3:51063894-51127835	8.3867	20.783	1.30923	0.00118002
SYNGR3	14:6170642-6190153	3.05165	0.953555	-1.6782	0.0224108
Sulf1	2:115993904-116060835	12.7308	6.20739	-1.03627	0.015395
SUCLG1	4:85721718-85737210	48.7636	171.491	1.81426	0.00118002
SUCLA2	1:167942414-167962710	83.8964	365.38	2.12272	0.00118002
STYK1	1:77852890-77868563	6.28853	15.7184	1.32166	0.0140201
STXBP5L	1:78926394-79112873	3.03897	1.08114	-1.49103	0.0298082
STXBP4	18:5811035-5877279	5.12143	1.73362	-1.56276	0.0391645
STRIP2	1:710116-727850	5.74581	16.6124	1.53168	0.00118002
STON2	5:40144827-40210981	3.87523	10.6854	1.46329	0.00577906
STK10	13:8133601-8180065	5.57849	12.1087	1.1181	0.0124848
STIL	8:20820462-20837889	2.28911	0.638019	-1.84311	0.0114831
STEAP3	7:27906367-27920392	9.38181	3.23805	-1.53474	0.00512235
STC2	13:8561503-8571173	1.11958	10.0469	3.16573	0.00118002
ST8SIA6	2:19614632-19653024	10.587	4.05864	-1.38322	0.0211297
ST8SIA2	10:13994579-14019205	5.35021	1.51281	-1.82236	0.0309761
ST7	1:24602261-24730292	6.93626	14.7682	1.09026	0.0346984
ST6GALNAC3	8:18285629-18394021	16.6182	6.40434	-1.37564	0.0365612
ST6GAL1	9:4744220-4774365	9.98268	23.9137	1.26034	0.00371511
ST3GAL6	1:83614755-83656869	19.2198	50.3754	1.39013	0.00641661
SSRP1	5:16332742-16340495	21.3326	10.342	-1.04455	0.0198868
SQSTM1	13:12782158-12786548	9.17489	68.354	2.89726	0.00118002
SPON2	4:84441719-84468575	11.6592	5.66109	-1.04231	0.0224108
SPON1	5:5838065-6002800	4.90855	14.5695	1.56959	0.00118002
SPOCK3	4:23947373-24051813	3.56941	0.778635	-2.19667	0.039721
SPDL1	13:3495327-3519105	6.61819	2.98444	-1.14898	0.031672
SPC25	7:18426549-18430278	18.6556	4.83289	-1.94865	0.00118002
SOX8	14:5739427-5742818	7.9352	2.98189	-1.41204	0.03507
Sox11	3:94137727-94138918	10.9417	3.31738	-1.72172	0.0150256
SORBS2	4:60705450-60848345	4.59771	9.27294	1.01211	0.0278982
SOD2	3:44923213-44929994	125.009	360.797	1.52916	0.00118002
SNX10	2:32350695-32384116	1.48132	5.15493	1.79907	0.00443086
SNCG1	6:2108593-2115926	15.0268	1.35757	-3.46843	0.00118002
SNAP29	15:74361-83428	13.6164	27.6126	1.01999	0.0235742
SMPX	1:118550326-118558867	334.066	691.565	1.04973	0.0194823
SMPD3	11:143379-253087	2.73173	0.148018	-4.20597	0.00118002
SMPD1	1:193606070-193608712	3.27656	9.97455	1.60607	0.00880977
SMOX	4:87924321-87944779	6.2265	21.6025	1.7947	0.00118002
SMDT1	1:49277066-49279093	25.6837	71.8417	1.48397	0.00118002
SMC4	9:21626304-21657730	30.9608	9.84318	-1.65325	0.00118002
SMARCAL1	7:22835948-22873570	3.72804	1.51992	-1.29442	0.0171702
SLMO1	2:97084766-97095158	3.02881	23.4324	2.95168	0.00118002
SLCO2B1	1:195193900-195237670	2.49545	5.55177	1.15365	0.0309761
SLC9A9	9:10197230-10365969	8.52572	2.41539	-1.81957	0.00118002
SLC6A4	19:6201883-6214012	0.926814	3.54186	1.93416	0.0211297
SLC4A7	2:39023044-39102309	25.6525	82.3671	1.68297	0.00118002
SLC4A11	4:88388932-88471731	4.15954	10.3501	1.31514	0.0114831
SLC43A2	19:5305961-5329691	11.5318	28.0613	1.28297	0.0124848
SLC41A3	12:10475438-10492889	2.0908	10.5397	2.3337	0.00118002
SLC39A6	2:88565388-88578292	11.2881	4.90247	-1.20323	0.0239204
SLC38A4	1:31044182-31064734	1.50951	13.8201	3.19461	0.00118002
SLC38A2	1:30927997-30943097	26.7254	157.299	2.55722	0.00118002
SLC35G1	6:19821568-19832272	0.505175	4.82179	3.25471	0.00118002
SLC35F4	5:55279122-55387350	0.135556	1.18182	3.12405	0.0375131
SLC35F1	3:62486815-62723122	6.89186	2.59527	-1.40901	0.00214311
SLC29A1	3:29637258-29654613	14.8651	30.9134	1.0563	0.0109831
SLC26A5	1:12815214-12848571	3.24125	9.31389	1.52283	0.00577906
SLC25A48	13:14577076-14648367	1.35468	0.336948	-2.00735	0.0371814
SLC25A4	4:38807036-38809857	213.611	5926.47	4.79412	0.00118002
SLC25A33	21:3398304-3417478	2.7484	7.45744	1.44009	0.0283204
SLC25A30	1:167080642-167087881	5.29052	39.1585	2.88784	0.00118002
SLC25A3	1:46514909-46522801	235.25	813.056	1.78916	0.00118002
SLC25A25	17:4797149-4819726	3.64694	13.709	1.91037	0.00118002
SLC25A15	1:169805865-169821444	2.81568	43.1443	3.93761	0.00118002
SLC22A3	3:44704893-44728363	0.417298	6.84329	4.03554	0.00371511
SLC22A16	3:65931798-65962885	35.3885	5.76458	-2.618	0.00118002
SLC19A2	1:83056656-83070746	1.33857	3.61577	1.43361	0.0140201
SLC16A7	1:31999957-32082280	5.91212	63.7258	3.43013	0.00118002
SLC16A3	18:4840924-4844689	13.7276	31.7059	1.20767	0.00641661
SLC15A2	7:25892438-25928915	2.25989	0.486688	-2.21518	0.03507
SLC12A5	20:10922029-10944646	0.826235	3.32694	2.00957	0.00880977
SLBP	4:83495205-83502378	4.23922	0.697561	-2.60341	0.0076143
SKA3	1:177848352-177857843	3.16075	0.792278	-1.99619	0.031672
SIPA1L2	3:38474948-38612626	33.2023	16.339	-1.02296	0.03015
SIM2	1:106178800-106234015	3.39259	0.40671	-3.06031	0.00938095
SIK1	1:109234441-109247196	21.9132	97.47	2.15316	0.00214311
SHROOM3	4:49156408-49291621	10.7795	4.03602	-1.41729	0.00118002
SHISA2	1:176294303-176296214	33.2942	4.27144	-2.96247	0.00118002
SHCBP1	11:7351097-7365112	11.4271	2.2729	-2.32986	0.00118002
SH3PXD2A	6:23349106-23406139	108.817	43.7609	-1.31419	0.00296991
SH3GL3	10:10908821-10953483	4.33988	1.30642	-1.73204	0.0369229
SH3D19	4:32689662-32763496	31.22	14.4586	-1.11054	0.00641661
SGOL1	2:36472066-36477374	4.51722	1.06711	-2.08173	0.00443086
SGK1	3:55463038-55468606	38.8228	141.929	1.8702	0.00118002
SFRP2	4:19535951-19539594	19.8985	5.81518	-1.77477	0.00214311
SETD8	15:4986360-4990790	34.021	71.0062	1.06152	0.0219886
SETD4	1:105940136-105949579	1.85484	0.362236	-2.3563	0.0228282
SETD3	5:47783077-47906765	19.9623	8.32693	-1.26142	0.00512235
SESN3	1:184678726-184693135	85.2843	21.0396	-2.01917	0.00118002
SESN1	3:66547544-66556746	21.7105	176.232	3.02101	0.00118002
SEPHS1	1:6622787-6645067	18.4541	8.89109	-1.05351	0.0235742
SEMA5A	2:78760823-78897005	27.1903	12.1723	-1.15949	0.00880977
SELT	9:23099582-23105258	46.6415	124.752	1.41938	0.00118002
SELO	1:20071620-20084350	3.11699	9.1484	1.55336	0.00296991
Segment	17:8212309-8238531	1.4429	0.364033	-1.98683	0.0263636
SEC24D	4:54343364-54387579	31.0561	12.2166	-1.34604	0.00118002
SEC14L5	14:13330124-13358238	1.49415	4.11763	1.46249	0.0239204
SDR42E2	14:8625051-8635053	7.36179	0.807831	-3.18793	0.00118002
SDK2	18:9295297-9337253	4.32108	1.26069	-1.77718	0.00118002
SDHA	2:85681938-85697842	108.986	349.879	1.68271	0.00118002
SCUBE2	5:8927056-8961764	5.16359	0.773714	-2.7385	0.00118002
SCUBE1	1:68715573-68928375	2.17697	0.610551	-1.83414	0.0274941
SCPEP1	18:6267874-6278615	13.7386	5.08897	-1.43279	0.00214311
SCN5A	2:5408260-5613834	0.781626	4.06123	2.37737	0.00118002
SCN3A	7:19389218-19468431	1.9261	0.322061	-2.58028	0.00118002
SCIN	2:26871391-26920922	3.43591	0.700264	-2.29472	0.00118002
SCG3	10:8596069-8621388	10.9496	2.10662	-2.37787	0.00118002
SCARA5	3:104760090-104779321	9.84348	20.641	1.06827	0.0453907
SARDH	17:7026159-7045384	5.62579	0.982737	-2.51718	0.00118002
SAR1B	13:15065094-15075296	17.6289	54.7211	1.63416	0.00118002
SAP30L	13:11460980-11472314	24.6454	53.4566	1.11705	0.0109831
SAMSN1	1:97445927-97480511	2.10512	0.463486	-2.1833	0.0399826
SALL1	11:5418070-5433815	1.06489	0.108104	-3.30021	0.00577906
S1PR1	8:10616089-10617229	11.223	23.6593	1.07594	0.044125
RTKN2	6:7670731-7703464	4.97825	1.40563	-1.82442	0.00371511
RTEL1	20:10003532-10043811	2.21654	0.978081	-1.18029	0.0298082
RRM2	3:96087198-96092245	17.8681	3.73928	-2.25655	0.00118002
RPL3L	14:6122543-6129901	2.71873	25.6624	3.23865	0.00118002
RPL22L1	9:19191687-19193717	619.494	305.309	-1.02082	0.0287402
RPB6	1:50924001-50927570	76.3805	160.319	1.06967	0.0203014
RPAP2	8:13111420-13146924	6.35985	13.7523	1.1126	0.0140201
ROGDI	14:14417772-14429013	6.05584	16.1273	1.41311	0.031672
ROCK2	3:96746491-96802174	50.7252	112.321	1.14685	0.0256038
RNF217	3:59606825-59662599	16.6522	6.85507	-1.28047	0.0290925
RNF207	21:629997-638932	2.09765	7.50174	1.83845	0.00118002
RNF150	4:29246318-29359420	18.1021	5.83	-1.63459	0.00214311
RNF144B	2:60324505-60357712	1.04021	8.21718	2.98177	0.00998534
RNF122	22:1603362-1619730	29.8071	3.8012	-2.97113	0.0076143
RNF103	4:85175054-85192537	6.93007	14.598	1.07483	0.0287402
RNASET2	3:41810098-41831299	7.93211	3.11932	-1.34647	0.0235742
RIMKLB	1:75460566-75494768	8.98419	3.36918	-1.41499	0.0211297
RIMBP2	15:3219107-3322455	58.989	27.7014	-1.09049	0.0130279
RILPL1	15:4956024-4976849	43.9166	107.593	1.29274	0.00371511
RIF1	7:34645143-34673334	13.8937	5.78292	-1.26457	0.00214311
RHPN1	2:148019430-148043870	0.950567	5.18969	2.44879	0.00118002
RHOT1	18:6624342-6648431	17.658	36.5406	1.04918	0.0176848
RGS9	18:7997935-8029708	2.923	1.04795	-1.47988	0.046996
RGS5	8:3673352-3680425	12.2369	34.4364	1.4927	0.00118002
RGS4	8:3667315-3672669	4.13386	10.5087	1.34603	0.0158235
RFTN2	7:9753088-9778093	87.3656	22.0756	-1.98461	0.00118002
RFC3	1:173144178-173161079	2.84144	1.11703	-1.34696	0.0181164
REV-ERBb	2:37787390-37809859	5.21372	27.3829	2.39289	0.00118002
RERG	1:62779915-62887409	31.5739	13.5564	-1.21976	0.00641661
RELN	1:12865260-13129087	8.62441	3.68631	-1.22625	0.0076143
REEP1	4:85073826-85100625	47.6582	99.3994	1.06051	0.0232224
RCAN2	3:109338624-109369202	2.67366	17.8434	2.7385	0.00118002
RBM38	20:11959015-11971950	68.2236	155.994	1.19314	0.00998534
RBL1	20:626684-647924	7.08204	3.47703	-1.02631	0.029463
RASSF6	4:50293964-50313187	0.525883	4.15087	2.9806	0.0343965
RASGEF1B	4:45006256-45022555	5.76002	2.52228	-1.19134	0.0399826
RASD1	14:4778982-4780829	1.41285	4.61251	1.70694	0.0453907
RARRES1	9:21904933-21912426	15.6983	32.6997	1.05867	0.0384948
RAPGEF5	2:30757165-30909032	10.2959	26.8477	1.38273	0.00118002
RAP2B	18:4042901-4043528	0	3.60704	2.20384	0.00118002
RAP1GAP2	19:9525770-9567750	1.51778	4.50281	1.56886	0.00296991
RAP1GAP	1:77199328-77231946	6.18125	13.3515	1.11103	0.0384948
RANBP9	2:60606706-60644558	13.9204	30.4628	1.12985	0.00938095
RAMP1	7:4591384-4595864	4.32332	21.9063	2.34113	0.00118002
RALGPS2	8:6281611-6391581	24.7289	10.7124	-1.20692	0.0271484
RAD51	5:950878-957935	5.27152	1.0961	-2.26583	0.0171702
RAD18	12:19282100-19316352	10.8902	4.66362	-1.22351	0.03507
RAB40B	18:3340421-3363541	1.2776	4.91937	1.94504	0.0219886
RAB31	2:98272960-98304970	13.5659	5.27589	-1.3625	0.0144396
QRSL1	3:67502289-67522895	7.36472	22.9311	1.6386	0.00214311
PYGB	3:4121557-4135789	2.40298	5.32881	1.14899	0.0361726
PXDNL	20:9382941-9424831	8.73024	2.77813	-1.65191	0.00118002
PVRL3	1:87611976-87655399	25.6129	10.2713	-1.31826	0.00371511
pvalb1	1:51455039-51463393	0.786007	134.355	7.4173	0.00443086
PURH	7:4312645-4330369	28.8394	13.7548	-1.0681	0.0163146
PTX3	9:22173836-22221855	0.694419	2.40109	1.78981	0.0144396
PTTG1	13:7160403-7162582	13.699	4.07957	-1.74759	0.0324476
PTPRT	20:3189961-3615919	20.1343	2.45093	-3.03826	0.00118002
PTPRF	8:18794147-19051645	9.16196	3.48154	-1.39593	0.00118002
PTPRB	1:35803700-35863585	11.2457	23.9511	1.09072	0.0120027
PTH1R	2:3560823-3688454	3.80999	1.1505	-1.72753	0.0339964
PTGFRN	1:91358734-91424437	18.9278	6.47862	-1.54675	0.00118002
PTGDS	17:509033-511024	4.0225	32.8785	3.03098	0.00118002
PSMD14	7:20876176-20921590	39.7644	81.4086	1.0337	0.0124848
PSMD1	9:14616053-14669519	36.7614	88.0341	1.25987	0.00118002
PSCA	2:147859018-147863129	0.710776	3.71461	2.38574	0.03015
PRPS2	1:122869210-122893310	42.5656	9.99394	-2.09056	0.00118002
Protein	2:31896369-31896854	327.707	1715.78	2.38839	0.00118002
PROSC	22:2189694-2193856	21.3215	45.8684	1.10519	0.0104667
PRKCQ	1:3559594-3595000	6.92001	3.12414	-1.14732	0.0303998
PRKACB	8:15584074-15620490	24.5343	52.167	1.08834	0.0158235
PRIM2	3:86044770-86130756	2.39928	0.729108	-1.71839	0.0076143
PRDM5	4:53644936-53729832	4.27052	1.75902	-1.27964	0.0239204
PRCP	1:188219968-188248544	17.6417	7.79327	-1.17869	0.0185564
PRC1	10:19561548-19563276	7.63635	1.3088	-2.54463	0.0158235
PQLC2L	9:22146849-22157886	7.84107	2.66637	-1.55617	0.0135617
PPTC7	15:5949728-5967621	12.0359	57.1831	2.24825	0.00118002
PPP2R2C	4:79113278-79195376	19.7953	1.45831	-3.76279	0.00118002
PPP1R3C	6:19416646-19417606	7.41569	91.6182	3.62698	0.00118002
PPP1R3B	4:48960038-48966650	3.65613	9.97705	1.4483	0.00118002
PPP1R36	5:52751905-52779302	2.21894	10.1074	2.18748	0.00118002
PPP1R2	9:12157986-12170689	23.3345	47.2573	1.01808	0.0194823
PPP1R1C	7:13606938-13647794	28.4123	8.46989	-1.7461	0.00118002
PPP1CB	3:26566430-26596265	174.6	362.789	1.05508	0.0354152
PPIF	6:11813048-11820969	11.8094	46.274	1.97026	0.00118002
PPIA	22:4060939-4061857	389.222	153.901	-1.33859	0.00118002
PPFIBP2	5:6774140-6856264	81.4198	28.1161	-1.53398	0.00118002
PPDPF	20:9368434-9370742	229.124	791.875	1.78914	0.00118002
PPAR	1:71411619-71442947	14.59	80.5393	2.46472	0.00118002
POLR3F	3:14736296-14743873	26.6447	55.6169	1.06167	0.0198868
POLR2K	2:128171122-128173950	36.2134	90.0833	1.31473	0.0198868
POLQ	1:78861462-78918451	2.02904	0.798647	-1.34517	0.0150256
POLN	4:82459165-82544586	1.21102	0.273391	-2.14718	0.0181164
POLG2	18:6852728-6858096	28.4266	12.2042	-1.21987	0.00826406
POC1B	1:43207668-43254712	2.565	1.04843	-1.29072	0.0260058
PNPLA2	5:15118616-15140092	16.8269	471.424	4.80818	0.00118002
PNOC	3:105308182-105311570	36.2384	1.37427	-4.72079	0.00118002
PMS2	14:977557-989310	10.341	4.58417	-1.17364	0.0290925
PM20D2	3:75200803-75217332	7.12916	127.599	4.16175	0.00118002
PLOD1	21:5514082-5536991	65.4778	31.7159	-1.0458	0.0267986
PLN	3:62306227-62441189	33.0038	368.234	3.47992	0.00118002
PLK4	4:33788158-33802241	6.88536	2.11851	-1.70048	0.00118002
PLK1	14:6884684-6889434	12.7241	1.79743	-2.82356	0.00118002
PLEKHH1	5:28086529-28131508	0.178945	1.27593	2.83396	0.0198868
PLCXD1	1:129423876-129442045	6.21603	1.03317	-2.58892	0.00214311
PLCL2	2:35030728-35122053	23.1408	100.472	2.11828	0.00118002
PLCB1	3:13593274-13906402	22.5144	57.4436	1.3513	0.00577906
PLB1	3:26632538-26715148	0.637343	2.79007	2.13016	0.00118002
PLAGL1	3:51565685-51567499	19.0012	9.04823	-1.07038	0.0381698
PLA2G4A	8:9703364-9767904	28.3618	13.035	-1.12156	0.0076143
PLA2G15	11:69376-88589	13.2158	32.4666	1.29669	0.00443086
PKP2	1:58971759-59016900	1.30296	0.323703	-2.00906	0.0163146
PKM	10:1071515-1106648	140.718	344.306	1.29088	0.0190384
PKDCC	3:22667611-22700224	15.0353	6.38571	-1.23544	0.0120027
PKD2L2	13:13728685-13739566	33.8085	114.565	1.76071	0.00118002
PITX2	4:57404742-57409306	16.4964	58.2304	1.81962	0.00118002
PINK1	21:4897970-4906221	4.11025	9.74266	1.24509	0.0120027
PIM3	1:18948098-18951794	9.74507	31.9151	1.7115	0.00118002
PIKFYVE	7:13314357-13372522	6.93819	14.6641	1.07966	0.0158235
PIK3C2G	1:64133607-64331932	0.777272	2.28429	1.55525	0.0144396
PIEZO2	2:97607395-97902750	15.0316	3.64173	-2.04531	0.00118002
PI15	2:118088995-118111354	20.0047	1.4266	-3.80969	0.00118002
PHYH	1:6604838-6614012	23.898	69.2829	1.53561	0.00118002
PHKG1	19:4896317-4901236	24.5974	97.3428	1.98457	0.00118002
PHKA2	1:119835500-119872605	15.9351	4.61192	-1.78877	0.00118002
PHKA1	4:1841835-1857989	6.07964	49.2911	3.01927	0.00118002
PHGDH	8:4233644-4236981	6.62546	1.37398	-2.26966	0.00296991
PGM3	3:77333023-77340752	10.9845	4.67549	-1.23228	0.039721
PGM1	8:26764667-26783622	96.0245	222.134	1.20995	0.0140201
PGK1	4:12898193-12909392	84.5949	263.37	1.63845	0.00118002
PFKFB4	12:1359538-1396127	32.2461	13.5195	-1.25408	0.00443086
PERM1	21:2847288-2865854	6.28298	12.8239	1.02932	0.029463
PER3	21:291839-308592	1.69889	4.95366	1.54391	0.00641661
PER2	9:4978757-5005060	7.28163	17.2486	1.24415	0.00296991
PENK	2:111076868-111081312	97.0843	5.91211	-4.03749	0.00118002
PDSS1	2:15977930-15999697	14.008	31.0588	1.14875	0.0232224
PDPR	11:1775733-1793123	7.16129	17.0558	1.25197	0.00512235
PDP1	2:125683594-125690722	8.6766	24.3518	1.48883	0.00118002
PDLIM7	13:9489573-9506020	12.0114	4.47773	-1.42357	0.00880977
PDLIM5	4:57807175-57923545	31.4998	64.0984	1.02495	0.0420677
PDLIM3	4:60669449-60692637	251.621	1083.9	2.10691	0.00998534
PDK4	2:24033199-24043554	42.303	532.897	3.65502	0.00118002
PDK3	1:117529893-117579804	55.3754	155.945	1.49372	0.00214311
PDK1	7:17199466-17208239	42.2993	85.9106	1.0222	0.0171702
PDIA5	7:26336030-26417103	27.7915	11.3407	-1.29314	0.00296991
PDHX	5:18152187-18191503	17.0992	47.1644	1.46377	0.00118002
PDHB	12:11808519-11813000	77.1612	221.507	1.52141	0.00118002
PDHA1	1:119705078-119717030	63.4456	377.287	2.57207	0.00118002
PDE4B	8:27415315-27426443	5.06897	14.2009	1.48622	0.00118002
PCYT2	18:10223920-10233484	20.7201	45.1434	1.12348	0.0114831
PCYOX1	22:2986874-2992097	19.089	39.0385	1.03216	0.015395
PCOLCE2	9:10037452-10060212	5.7985	22.979	1.98657	0.00296991
PCNXL2	3:38182462-38327510	0.817888	0.270854	-1.59439	0.0307119
PCNA	22:334051-336642	49.3694	24.6361	-1.00284	0.0381698
PCMTD1	2:109171031-109214217	14.3753	35.4533	1.30233	0.00443086
PCDH15	6:5764829-6063170	6.30463	0.42298	-3.89775	0.00118002
PBEF1	1:14037838-14064141	27.5585	70.8348	1.36196	0.00118002
PATZ1	15:9016145-9033904	4.98741	1.99223	-1.32391	0.0443872
PARVG	1:69327838-69350968	2.95339	1.24166	-1.2501	0.039721
PARVB	1:69267298-69326091	99.4571	43.7654	-1.18428	0.0252177
PAPLN	5:25589640-25615991	7.59752	3.31468	-1.19666	0.0224108
PANX2	1:19947198-19967662	0.659822	4.9138	2.89669	0.00118002
PANK1	6:18940668-18958874	18.9638	95.0945	2.32611	0.00118002
PAM16	14:12692323-12694121	21.9681	73.7097	1.74644	0.00118002
PALMD	8:11063861-11128777	37.0371	76.2628	1.04201	0.0256038
PACSIN3	5:22468639-22488574	545.848	213.402	-1.35493	0.00880977
P3H3	1:76713680-76725911	8.32407	3.98812	-1.06158	0.0357825
P37NB	1:12647568-12735694	84.4821	23.2648	-1.8605	0.00118002
P2RY2	1:194466867-194469256	0.978798	10.0317	3.35742	0.00118002
OTUD1	2:17237192-17240043	9.03705	40.1561	2.15169	0.00118002
OSGIN1	11:2590159-2594660	2.4847	11.6619	2.23066	0.00118002
OSBPL6	7:14935827-14977668	3.02205	11.248	1.89607	0.00118002
OSBPL1A	2:102948951-103020897	16.8149	40.4135	1.2651	0.00371511
OSBP2	15:10698914-10762511	5.63229	14.9958	1.41276	0.00443086
ORC4	7:34059512-34072973	10.7732	3.73094	-1.52983	0.00880977
ORC1	8:23276660-23291886	2.7728	0.681917	-2.02368	0.0120027
ORAI1	15:5574192-5584055	8.07412	19.4374	1.26746	0.0403209
OPTN	1:6559299-6578617	21.1646	68.2107	1.68834	0.00118002
OLFML1	5:6739771-6750882	1.56773	4.25949	1.442	0.0104667
OLFM1	17:7609612-7627804	26.3406	9.01716	-1.54654	0.00118002
OGDH	22:4027420-4048078	37.3238	147.133	1.97896	0.00118002
OBFC1	6:23585344-23623213	8.16782	2.96496	-1.46194	0.0185564
NYAP2	9:8228459-8351304	0.183098	0.818659	2.16065	0.0215793
NUSAP1	5:23859403-23873313	19.2548	4.20073	-2.1965	0.00118002
NUP43	3:47489108-47498142	9.4562	4.2085	-1.16796	0.039457
NUF2	8:5439984-5450983	23.6682	4.35451	-2.44237	0.00118002
NUAK1	1:53895863-53940812	17.5419	43.483	1.30964	0.00371511
NTN4	1:45466329-45505575	1.12374	2.78022	1.30689	0.0224108
NTN3	14:14014722-14042108	1.10366	0.264185	-2.06267	0.0309761
NT5E	3:76375726-76397579	15.6743	3.78167	-2.05131	0.00118002
NT5DC3	1:54903959-54923285	12.0636	29.9074	1.30984	0.00512235
NT5C3A	2:48554439-48577945	22.7927	130.766	2.52035	0.00118002
NRCAM	1:28525498-28668231	3.29966	1.55966	-1.08109	0.0384948
NR5A2	8:1580724-1668861	6.89113	3.02255	-1.18897	0.0242802
NR4A3	2:89372988-89395602	2.30977	10.3221	2.15992	0.00118002
NR4A2	7:35531191-35536596	0.487397	2.18484	2.16436	0.0298082
NPTX2	14:1223939-1234418	4.90124	1.92543	-1.34796	0.0252177
NPAS2	1:132654999-132723188	0.642313	2.22248	1.79082	0.0181164
NOC4L	15:2557168-2567628	14.6981	6.40186	-1.19906	0.00998534
NIPAL4	13:10642121-10680834	4.41365	1.43921	-1.61669	0.0235742
NFKBIZ	1:84799654-84816004	1.0951	4.17476	1.93064	0.00702696
NFKBIA	5:35468939-35506004	5.4111	16.3863	1.5985	0.00118002
NEIL3	4:41684407-41701702	1.74717	0.312999	-2.48079	0.0219886
NDUFV3	1:108926007-108928938	47.9887	154.295	1.68493	0.00118002
NDUFV2	2:98526883-98541978	60.093	149.673	1.31654	0.00443086
NDUFV1	5:87692-93802	42.6371	156.925	1.8799	0.00118002
NDUFS8	5:199551-201194	47.221	133.459	1.4989	0.00118002
NDUFS6	2:86002616-86007620	169.372	456.696	1.43104	0.00118002
NDUFS3	5:22088780-22093418	79.2132	236.094	1.57555	0.00118002
NDUFS1	7:12077168-12090936	138.747	433.422	1.64332	0.00214311
NDUFC2	1:192061272-192064192	19.0672	49.6175	1.37976	0.00296991
NDUFB9	2:138071063-138074938	96.1401	215.151	1.16214	0.0104667
NDUFB8	6:16971566-16974297	85.3389	209.56	1.29609	0.00118002
NDUFB6	14:13393594-13395738	99.8512	281.258	1.49404	0.00118002
NDUFB5	9:16903952-16907474	250.402	664.037	1.40702	0.00214311
NDUFB4	1:79257199-79258833	40.4394	91.6326	1.1801	0.00296991
NDUFB3	7:10893770-10897452	202.008	427.794	1.0825	0.0207099
NDUFB10	14:6130747-6132664	196.168	575.354	1.55236	0.00118002
NDUFB1	5:43845119-43847133	32.3939	101.978	1.65446	0.0391645
NDUFAB1	14:6864895-6866786	49.0338	147.619	1.59003	0.00118002
NDUFA9	1:73518013-73537657	97.725	305.637	1.64502	0.00118002
NDUFA8	17:8704355-8706618	37.3849	114.923	1.62014	0.00118002
NDUFA5	1:22078541-22084456	57.8566	125.791	1.12047	0.00938095
NDUFA4	2:26144941-26148789	326.856	961.82	1.55711	0.00371511
NDUFA12	1:45179842-45187320	220.819	522	1.24119	0.00577906
NDUFA10	7:6552330-6592902	68.6546	176.544	1.3626	0.00577906
NDUFA1	4:16454194-16454917	212.545	495.741	1.22182	0.00296991
NDC80	2:100833604-100852126	10.1264	2.0145	-2.32962	0.00118002
ND6	MT:16183-16705	864.277	2034.92	1.23541	0.0235742
ND2	MT:5240-6355	569.774	1418.79	1.3162	0.0211297
ND1	MT:4049-5024	838.216	2944.22	1.81249	0.00443086
NCEH1	9:18723962-18739402	9.62004	72.3976	2.91183	0.00118002
NCAPH2	1:608682-618167	4.00494	0.776417	-2.36688	0.0104667
NCAPH	22:2937123-2946362	8.55817	2.0876	-2.03546	0.00118002
NCAPG2	2:9417856-9456238	2.07866	0.497032	-2.06424	0.00118002
NCAPG	4:75480299-75503309	8.4499	1.54139	-2.45471	0.00118002
NBL1	21:4764693-4774114	46.9476	12.4771	-1.91177	0.00118002
NBEAL1	7:13190343-13266973	12.3256	26.127	1.08388	0.0158235
NAV3	1:38593309-38850635	13.1254	6.43087	-1.02927	0.0130279
NASP	8:20075621-20085978	18.1361	5.95019	-1.60786	0.00118002
NAA20	7:36209703-36213218	63.3784	131.024	1.04777	0.015395
myosin	1:86879997-86923778	3.09252	0.243806	-3.66498	0.00118002
MYOF	6:19976862-20045126	6.47314	14.7811	1.19122	0.00577906
MYOC	8:4707986-4710477	0.331545	2.57615	2.95794	0.0303998
MYO9A	10:899893-1036065	7.90381	3.44582	-1.1977	0.00826406
MYO10	2:75483064-75633537	28.9865	6.73054	-2.10659	0.00118002
MYLK4	2:67611322-67673626	34.1645	103.32	1.59655	0.00118002
MYLK3	11:7284404-7304607	5.47393	14.9424	1.44876	0.00296991
MYLK2	20:10395494-10403016	3.45145	31.2499	3.17858	0.00118002
MYLIP	2:61562079-61576684	11.6797	30.6499	1.39188	0.00118002
MYL3	2:3420142-3455225	941.688	2858.31	1.60184	0.0256038
Myl2	19:3752430-3773359	898.702	2275.48	1.34026	0.0242802
MYCN	3:98778413-98780948	8.84048	3.79338	-1.22064	0.0381698
MYC	2:139316927-139321894	2.6803	6.43655	1.2639	0.0194823
MYBL2	20:3952513-3969262	10.2524	3.20636	-1.67695	0.00118002
MUSTN1	12:800690-804117	221.707	792.92	1.83852	0.00118002
MTUS2	1:174734825-174993334	1.73251	0.506525	-1.77416	0.0194823
MTURN	2:41948470-41960843	11.9846	5.18946	-1.20753	0.00938095
MRPS31	1:169827777-169849142	33.8016	144.377	2.09468	0.00118002
MRPS26	4:88165874-88171214	22.2627	50.4038	1.1789	0.00443087
MRPL2	3:4287639-4290846	22.7148	48.0288	1.08026	0.015395
MRPL15	2:110081052-110090275	45.134	100.012	1.14789	0.00641661
MPPED1	1:68983037-69033807	7.59294	3.72717	-1.02658	0.0242802
MPP6	2:31698416-31729759	31.9567	12.6725	-1.33442	0.00641661
MPP1	4:2104398-2118953	6.34669	33.7098	2.40909	0.00118002
MPEG1	5:16208865-16211779	2.03395	0.603803	-1.75213	0.0307119
MPC2	1:90862522-90869697	97.0575	412.117	2.08614	0.00118002
MPC1	3:42131325-42141404	54.1356	137.031	1.33985	0.00512235
MORN3	15:5585815-5594140	3.94389	20.2142	2.35768	0.00118002
MOCS1	3:28046780-28075053	6.90503	15.4742	1.16414	0.0228282
MNOC	4:28668011-28677226	1.65352	10.5267	2.67043	0.00214311
MND1	4:19356586-19395067	11.4279	3.53813	-1.69151	0.0263636
MMP28	19:4371004-4377836	4.85646	2.11029	-1.20246	0.0466603
MMP23B	21:2032008-2039306	19.8593	7.63583	-1.37896	0.00641661
MMP16	2:123445893-123621303	23.4156	10.6464	-1.1371	0.00826406
MMP13	1:181647082-181654718	1.61205	0.276496	-2.54356	0.0407106
MLF1	9:21936182-21948704	26.5653	234.072	3.13933	0.00118002
MKNK1	8:20699729-20715718	2.41841	9.63149	1.9937	0.00118002
MKKS	3:12961576-12970854	8.27723	17.9143	1.1139	0.0491897
MKI67	6:32890713-32910556	35.4613	6.82161	-2.37806	0.00118002
MITF	12:15468611-15557117	9.79949	24.692	1.33327	0.00118002
MIS18BP1	5:58605376-58623023	9.60681	3.51595	-1.45014	0.00118002
MIPEP	1:176655869-176725970	16.3939	36.8244	1.1675	0.00938095
MICU3	4:62820273-62869495	8.69784	17.8925	1.04062	0.0181164
MGP	1:47886139-47891373	47.5442	396.75	3.06089	0.00118002
MGLL	12:9598735-9655915	5.20934	14.7	1.49664	0.00118002
MFN1	9:16984937-17003984	40.0799	83.6555	1.06158	0.0203014
Metazoa_SRP	5:57588687-57588986	84.651	16.5455	-2.35508	0.00512235
ME3	1:188071572-188189672	17.9533	39.6123	1.1417	0.0114831
MDK	5:22947433-22948426	14.3574	4.90741	-1.54876	0.0313927
MDH2	19:4285317-4293888	154.964	476.793	1.62143	0.00214311
MDH1	3:9406398-9417141	176.995	654.766	1.88727	0.00118002
MCM5	1:51939573-51947830	6.64727	2.94095	-1.17648	0.0476637
MCM4	2:107695681-107707788	11.2181	5.0392	-1.15456	0.0181164
MCM3	3:107167585-107179385	5.25611	1.6251	-1.69346	0.0140201
MCM2	12:9725751-9737075	12.5391	4.50788	-1.47591	0.00214311
MCF2L	1:136949338-137097962	5.85737	12.6527	1.11112	0.0320609
MC1R	11:18287876-18288821	1.30349	0	-1.20382	0.00118002
MBNL2	1:144576578-144648440	3.38754	14.4264	2.09041	0.0482066
MB21D2	9:12741368-12791772	3.78139	9.60579	1.34499	0.00371511
MB	1:51849853-51853554	3.95843	118.219	4.90039	0.00118002
MAT1A	6:3915003-3932026	176.486	5.37583	-5.03692	0.00118002
MAPKAPK3	12:1840587-1881857	30.5577	82.6203	1.43496	0.00118002
MAPK6	10:8418111-8446458	40.6968	145.86	1.8416	0.00118002
MAP3K4	3:44538064-44608530	7.66091	17.1044	1.15878	0.00880977
MAP3K15	1:119632059-119703945	0.759365	12.203	4.0063	0.00118002
MAP2K3	14:4489592-4502734	4.42613	11.9991	1.43881	0.0163146
MAP1A	10:19691952-19739136	29.1247	13.9671	-1.06021	0.0198868
MAOA	1:110613429-110658911	7.05757	14.8119	1.06952	0.0190384
MAN2B2	4:79289513-79316474	11.2654	5.56326	-1.0179	0.037868
MAK	2:63302983-63336417	11.4132	36.9329	1.6942	0.00118002
MAD2L1BP	3:30214602-30217371	3.57499	1.14575	-1.64165	0.0167542
MAD2L1	4:53952131-53955591	9.54075	2.55645	-1.89996	0.00641661
LZTS1	22:1561513-1572900	2.68829	0.284065	-3.24239	0.0185564
LYPLA1	2:110068793-110078521	18.3971	41.6542	1.17898	0.0114831
LUM	1:43860882-43872867	301.203	82.8691	-1.86183	0.00118002
LTBP2	5:37210587-37268314	25.8697	10.8074	-1.25924	0.00296991
LRTM2	1:61113932-61229536	3.51571	1.25552	-1.48553	0.0144396
Lrrn1	12:18255109-18278207	10.2193	0.938057	-3.44548	0.00118002
LRRC8A	17:5305567-5310846	13.2386	28.4972	1.10607	0.0144396
LRRC3B	2:38757265-38843074	0.353936	2.1473	2.60096	0.00577906
LRRC30	2:99377050-99377947	1.14937	22.8436	4.31287	0.00214311
LRFN5	5:59384567-59393956	3.4988	0.713022	-2.29484	0.0176848
Lpin1	3:96971361-97044067	2.77042	31.7556	3.51883	0.00118002
LPCAT3	1:76836839-76852468	13.2434	31.7096	1.25965	0.00512235
LONRF2	1:132408310-132443622	34.311	9.99643	-1.77919	0.00118002
LMOD2	1:22047780-22055493	81.148	221.978	1.45179	0.00512235
LMCD1	12:19214896-19234835	5.46379	29.2154	2.41876	0.00118002
LGR5	1:36192579-36280194	3.54694	0.595175	-2.57519	0.00118002
LGR4	5:3647766-3711001	12.7302	5.6415	-1.17411	0.00512235
LGI1	6:19843307-19858688	1.05604	2.49119	1.23816	0.046996
LGALS1	4:49142912-49148727	11.4504	1.96625	-2.54187	0.00118002
LETM1	4:82881865-82908488	18.2444	57.5369	1.65704	0.00118002
Lef-1	4:37323507-37377729	3.22939	0.958363	-1.75262	0.0354152
LECT2	13:14532810-14537759	14.6938	1.99584	-2.88013	0.00118002
LECT1	1:165018165-165029891	18.5118	4.84308	-1.93445	0.00118002
LDHB	1:67177977-67190068	183.388	390.799	1.09153	0.0252177
LDHA	5:11936823-11942582	143.788	608.973	2.08243	0.00118002
LCT	7:30149348-30165520	1.05289	0.167905	-2.64864	0.0144396
LBH	3:7979474-7990141	9.0525	22.5753	1.31836	0.00296991
laminin	2:99400292-99499147	2.50685	0.377997	-2.72943	0.00118002
LAMB4	1:14725778-14766576	1.23843	0.200309	-2.62821	0.00371511
LACTB2	2:116455966-116473097	6.59888	13.6897	1.0528	0.0203014
LACE1	3:66809733-66870599	7.14443	16.925	1.24426	0.0167542
KPNA2	18:6953317-6958961	30.3871	4.65988	-2.7051	0.00118002
KNTC1	15:5903365-5940908	6.57344	1.59746	-2.04087	0.0260058
KLHL4	4:8058002-8091302	3.37481	1.02753	-1.71563	0.0163146
KLHL38	2:137696847-137701773	0.261332	21.2007	6.34209	0.00371511
KLHL34	1:118607773-118609561	5.38488	46.2191	3.1015	0.00118002
KLHL25	10:13454716-13456486	6.2398	19.9159	1.67435	0.00118002
KLHL24	9:2102435-2111626	33.3654	157.493	2.23887	0.00118002
KLHL22	15:8277459-8297517	4.6728	12.9832	1.47429	0.00296991
KLF3	4:69141180-69164821	3.78201	7.57422	1.00194	0.0431029
KLF15	12:10614315-10626926	22.8874	84.8596	1.89052	0.00118002
KLF13	10:5072622-5098236	7.56762	20.6122	1.44559	0.00214311
KIF4A	4:1248685-1265752	14.3104	2.82797	-2.33923	0.00118002
KIF23	10:18828577-18846365	12.5278	2.6652	-2.23282	0.00118002
KIF21A	1:15150169-15234468	5.96307	12.2879	1.04311	0.0171702
KIF20A	13:9368382-9397065	14.3296	2.73053	-2.39175	0.00118002
KIF18A	5:3874986-3920091	3.04444	0.633695	-2.26432	0.00118002
KIF15	2:43768480-43804535	15.4581	2.7227	-2.50525	0.00118002
KIF11	6:20272560-20290598	20.635	4.30767	-2.26011	0.00118002
KIAA1919	3:65614621-65620951	6.04707	12.7364	1.07465	0.0488632
KIAA1524	1:86946002-86980110	4.20304	1.00483	-2.06448	0.00118002
KIAA0408	3:58602132-58610245	4.06867	13.2022	1.69815	0.00118002
KIAA0226L	1:167410981-167430542	8.08262	3.27383	-1.30384	0.0167542
KERA	1:43843144-43851618	17.5942	1.3305	-3.72506	0.00118002
KDM7A	1:56827921-56860120	11.3561	24.5859	1.11436	0.00998534
KCNK2	3:20175603-20250749	3.54274	0.709612	-2.31976	0.00296991
KCNIP1	13:2890225-2905434	10.1728	1.40376	-2.85735	0.00118002
KCNH7	7:20330958-20538685	0.0988117	1.41581	3.84081	0.00118002
KCNE3	1:195076941-195078728	0.685466	4.95066	2.85246	0.039721
KBTBD3	1:180363213-180372172	1.43613	3.15121	1.13372	0.0365612
KBTBD12	12:9552453-9577601	2.87529	8.78955	1.61208	0.00371511
KAZALD1	6:22598416-22602875	3.85852	1.34594	-1.51943	0.0274941
KATNA1	3:47446106-47459848	21.9612	9.96594	-1.13988	0.0194823
JUN	8:25245190-25394154	72.7122	170.582	1.23019	0.00296991
JSC	13:14654458-14662648	29.666	3.16326	-3.22933	0.00118002
JPH1	2:117820323-117897580	86.991	309.665	1.83177	0.00118002
ITGB3BP	8:26713798-26739349	5.2453	1.47029	-1.83493	0.0130279
ITGA4	7:13767733-13852740	14.7425	6.54288	-1.17198	0.00577906
ISM2	5:38524086-38527515	5.4266	1.67355	-1.69713	0.0207099
IRK1	18:8381995-8571846	36.1661	94.7185	1.38901	0.00118002
IQUB	1:22086125-22106344	1.73965	9.13298	2.39228	0.00118002
IP6K2	12:8964185-8971788	11.6225	39.1851	1.75339	0.00118002
INCENP	5:16370273-16411563	12.7829	2.92064	-2.12986	0.00118002
IMMT	4:85046210-85059057	90.9415	210.086	1.20797	0.0130279
IL34	11:1707757-1713030	1.55165	6.45408	2.05641	0.00214311
IL18R1	1:133259700-133278851	1.05439	0.266598	-1.98367	0.0346984
IL17RD	12:8535419-8595065	9.36049	3.77897	-1.30859	0.00118002
IL15	4:29417198-29501587	4.6192	36.5338	2.98352	0.0224108
IGSF11	1:80278966-80367961	12.3361	4.00206	-1.62407	0.00118002
IGF-I	1:55432529-55480957	6.83813	1.83679	-1.89642	0.037868
IFT81	15:5368867-5424559	7.87086	3.75586	-1.06738	0.0488632
IFRD1	1:26846391-26865547	36.6492	125.069	1.77087	0.00118002
IFIH1	7:20543410-20570333	0.836664	2.17614	1.37905	0.0450481
IFFO1	1:76447734-76454025	11.7084	4.32188	-1.43781	0.00641661
IDH3A	10:3278741-3288427	63.3514	477.152	2.913	0.00118002
HSPB7	21:4309856-4311399	6.0939	179.649	4.88167	0.00118002
HSPA9	13:2134784-2156387	101.816	260.501	1.35532	0.00702696
HSPA4	13:16530628-16547788	30.4752	92.2826	1.59842	0.00118002
HSP90AA1	5:49388165-49393962	277.658	613.85	1.14458	0.0456743
HSCB	15:7691059-7703313	10.4067	33.9357	1.70529	0.00296991
HS3ST1	4:77624134-77625388	3.01221	10.7735	1.83859	0.00512235
HRASLS	9:12623431-12626925	7.24983	19.3798	1.41854	0.00214311
HPGD	4:43211797-43236772	6.4537	21.0747	1.70732	0.0076143
HPD	15:5682529-5686156	4.56618	17.9996	1.9789	0.00118002
HOMER2	10:10611346-10640515	10.1998	37.8881	1.8932	0.00118002
HNMT	7:30750465-30868567	59.6744	19.0303	-1.64881	0.00118002
HMOX2	14:12422255-12426476	10.0075	21.6878	1.1158	0.0478467
HMGB2	4:42740629-42743052	53.4977	14.6467	-1.8689	0.00118002
HJURP	1:87057511-87068130	7.90168	1.16767	-2.75853	0.00118002
HIVEP2	3:52031851-52056523	13.0746	34.1817	1.38646	0.00371511
HIST1H46	1:47926958-48009693	632.754	177.449	-1.83424	0.0278982
HIST1H2B7	1:48031981-48032362	366.579	116.222	-1.65724	0.00118002
HIST1H2B5	1:48027617-48027998	73.6757	18.1678	-2.0198	0.00512235
HIST1H111R	1:48033616-48034276	62.0506	21.6297	-1.52043	0.00118002
HIST1H111L	1:48025515-48026285	71.2364	28.6628	-1.31344	0.00880977
HIPK2	1:56212497-56296143	16.7115	39.0041	1.22278	0.00641661
HIGD1A	2:2061654-2066620	19.0169	183.573	3.27099	0.00118002
HIBCH	7:135530-168113	62.121	138.784	1.15969	0.0171702
HES1	9:12410466-12423754	1.66662	5.71561	1.77798	0.00214311
HERC2	1:129860462-129965042	30.2289	106.13	1.81183	0.00118002
HELLS	6:16040531-16060443	12.4135	3.14913	-1.97888	0.00118002
HECW1	2:51911546-52082394	3.66131	1.38549	-1.40197	0.0120027
HECTD2	6:19338973-19374354	2.36396	7.64329	1.69299	0.00118002
HCCS	8:12277188-12284555	25.499	67.0907	1.39567	0.00118002
HBE1	1:193720894-193722856	58.3984	3.55554	-4.03779	0.00118002
HADHB	3:104607848-104619357	86.7626	405.888	2.22594	0.00118002
HADHA	3:104583826-104607643	149.931	415.794	1.47157	0.00702696
H2AFY2	6:11556861-11568617	12.8499	1.17955	-3.44545	0.00214311
GTSE1	1:15509091-15520120	5.9062	1.12178	-2.39645	0.00214311
GRPEL2	13:7857095-7861941	23.2542	47.6015	1.03352	0.029463
GRM7	12:18847534-19073767	1.98373	0.296136	-2.74389	0.00118002
GRIK1	1:103488817-103564194	5.66183	1.75293	-1.6915	0.0104667
GRHL1	3:96021130-96056953	1.09213	0.274328	-1.99317	0.0371814
GRB10	2:80801705-80940693	9.18184	45.3971	2.30575	0.00118002
GPX7	8:23344642-23353210	32.7633	12.4291	-1.39836	0.00296991
GPR27	12:16280537-16282735	4.63231	1.19244	-1.95782	0.0124848
GPR20	2:145753409-145778152	7.5201	1.94492	-1.95104	0.00214311
GPR146	14:2320567-2331815	3.05732	21.4443	2.81025	0.00118002
GPI	11:10450874-10471700	138.523	287.227	1.05207	0.0369229
GPD2	7:35565239-35605889	74.7391	33.2422	-1.16885	0.00826406
GPD1L	2:40901332-40926503	20.2831	50.2316	1.30832	0.00577906
GPAM	6:26158124-26183815	22.6199	65.8548	1.5417	0.00118002
GOT2	11:1467001-1476920	39.8108	149.669	1.91054	0.00118002
GOT1	6:21685680-21689250	56.0841	267.667	2.25477	0.00118002
GNMT	3:15379650-15381158	50.5895	6.8634	-2.88184	0.00118002
GLUL	8:5614756-5623685	5.21237	52.2524	3.32548	0.00118002
GLRX5	5:45330737-45337464	19.1349	45.1494	1.2385	0.00371511
GLMN	8:13146966-13173195	5.85786	13.1501	1.16663	0.015395
GK5	9:9877216-9898347	3.28194	8.85926	1.43264	0.00371511
GJD4	2:12778765-12787894	3.44599	0.644517	-2.41863	0.0298082
GGT7	20:469734-487112	2.91826	1.1726	-1.3154	0.0336181
GFPT2	13:13243832-13260270	5.3356	11.2196	1.07231	0.0235742
GFPT1	22:109340-137149	20.5592	9.29415	-1.14539	0.0109831
GFM1	9:21913506-21933383	21.0847	62.9622	1.57829	0.00118002
GDF8	7:195699-201192	91.065	30.2881	-1.58814	0.00118002
GBE1	1:94474404-94635350	16.7113	49.2964	1.56066	0.00118002
GATM	10:10400567-10413630	925.512	135.993	-2.76672	0.00118002
GAS2L3	1:47200247-47214430	7.0934	3.12731	-1.18155	0.0263636
GALNT16	5:27313855-27374224	11.5464	3.78805	-1.60791	0.00118002
GAL4	3:107097383-107099252	1.10109	0	-1.07114	0.00118002
GAD2	2:16147742-16180423	0.187152	0.799372	2.09465	0.0371814
GABRP	13:2855997-2879559	1.2412	0.199378	-2.63816	0.04644
GABRA1	13:6533384-6575415	3.19942	7.53857	1.23648	0.015395
GABARAPL1	1:77889105-77896485	33.0147	106.729	1.69277	0.00118002
FZD3	3:105466096-105513573	0.801919	0.164304	-2.28709	0.0328552
FYCO1	2:43339785-43363519	25.2045	99.1384	1.97576	0.00118002
FUNDC2	4:2148374-2154417	15.9122	36.086	1.18131	0.00296991
FSTL5	4:22250826-22516765	3.39221	1.39299	-1.28404	0.0263636
FSCN1	14:4184406-4190617	20.6008	6.39493	-1.6877	0.00214311
FSBP	2:125844097-125903394	4.56127	1.61187	-1.5007	0.00702696
FRMD4B	12:15329788-15396454	9.45427	3.85753	-1.29329	0.00296991
FREM2	1:170636417-170751330	24.5106	8.17001	-1.585	0.00118002
FOXM1	1:75109436-75119160	10.7165	2.90932	-1.88108	0.00118002
FOSL2	3:26737452-26743407	2.47571	8.98025	1.85891	0.0207099
FOS	5:37501648-37502995	1.28927	19.1009	3.88901	0.00118002
FN3K	18:3317543-3324433	1.03822	4.15469	2.00064	0.0076143
FMN2	3:35540377-35680173	1.76527	0.598056	-1.56153	0.0232224
FLVCR1	3:21114068-21122373	1.27996	3.97459	1.63471	0.0215793
FKHR	1:169877051-169935660	6.37585	15.9679	1.32449	0.015395
FITM2	20:5810985-5816101	17.7477	50.584	1.51105	0.00118002
FILIP1L	1:84070384-84224057	54.3482	121.575	1.16155	0.0232224
FHL2	1:134496863-134536397	4.47037	1.26327	-1.82324	0.0228282
FH	2:85666851-85681240	109.403	234.4	1.09932	0.0185564
FGL2	1:12549066-12605350	6.73743	18.7329	1.47531	0.00214311
FGFR4	13:9595614-9599869	14.0491	5.77952	-1.28146	0.0104667
FGFR3	4:82973160-83026374	2.58891	1.01094	-1.35665	0.015395
FGFR2	6:30411292-30490016	2.60261	0.851808	-1.61136	0.0120027
FGD3	12:6695374-6799774	12.2503	5.10528	-1.26276	0.00512235
FBXO40	1:76342956-76354161	6.77294	31.3476	2.2105	0.00118002
FBXO39	19:9893569-9897409	10.3579	4.55903	-1.18393	0.0354152
FBXO32	2:137644050-137668702	4.26531	67.4324	3.98272	0.00118002
FBXO30	3:45824454-45831133	12.6919	34.2131	1.43064	0.00118002
FBXL2	2:45172949-45209528	13.934	6.02111	-1.21051	0.00998534
FAT4	4:51926112-52061166	26.6843	11.4454	-1.22123	0.00826406
FAP	7:20575082-20613175	53.1869	25.1959	-1.07788	0.0215793
FANCI	10:12445138-12467989	2.49848	0.660697	-1.91899	0.00880977
FAM83D	20:4159057-4165656	3.21233	0.72952	-2.1386	0.0215793
FAM81A	10:6216547-6227549	6.05528	0.421308	-3.84525	0.0104667
FAM73B	17:5458245-5472221	4.2957	11.5849	1.43129	0.0076143
FAM69C	2:91882133-91893812	9.89284	1.92518	-2.36139	0.00118002
FAM65C	20:13811823-13879197	5.31139	14.3312	1.432	0.00443086
FAM214A	10:8193074-8224905	13.8723	30.8404	1.15262	0.00443086
FAM185A	1:12607529-12647356	2.81343	8.49095	1.59359	0.00371511
FAM162A	1:76278351-76285046	45.5932	91.8023	1.00971	0.0336181
FAM13B	13:13695528-13725044	48.2512	168.57	1.80471	0.00118002
FAM129A	8:7933907-7992849	51.0008	18.2704	-1.48101	0.00118002
FAM110B	2:111602454-111603567	13.6209	1.98616	-2.77777	0.00214311
FAM107B	1:7160121-7169485	15.5495	6.08022	-1.35467	0.00118002
FABP7	3:60674293-60677648	11.8244	3.53943	-1.74018	0.0339964
FABP5	2:121148556-121153615	248.002	543.542	1.13204	0.0267986
EYA2	20:6012483-6104467	15.0525	6.11939	-1.29855	0.0104667
EXO1	3:35065029-35080589	5.45605	0.762645	-2.83877	0.00296991
ETS2	1:107167342-107180491	25.215	11.091	-1.18489	0.00880977
ETFDH	4:21379597-21405790	52.086	150.964	1.53524	0.0124848
ETFA	10:2858653-2989154	34.2799	80.7593	1.23627	0.0140201
ESYT2	2:9467166-9532244	26.2279	55.2072	1.07375	0.0135617
ESRRG	3:19553877-19675355	18.8359	42.4392	1.17191	0.0109831
ESRRB	5:37917632-38140798	4.66515	11.9674	1.35912	0.00641661
ERI2	14:14913150-14927428	0.814366	0.229923	-1.82453	0.0473009
ERCC6L	4:1647893-1651700	2.9833	0.693039	-2.1059	0.00577906
EPHX2	3:104712778-104721569	7.38513	15.6536	1.0838	0.0339964
EPHB1	9:3230462-3257134	22.7981	7.6048	-1.58393	0.00118002
EPHA3	1:88543353-88765491	20.0199	7.30469	-1.45454	0.00118002
EphA2	21:4318354-4326236	1.06689	3.00909	1.49592	0.0271484
EPDR1	2:46706838-46735913	10.4174	4.90311	-1.08722	0.0431029
EPAS1	3:25947697-26020803	37.2746	107.607	1.5295	0.00118002
ENTPD5	5:36989048-37003244	8.04666	24.46	1.60396	0.00214311
ENTPD2	17:402426-410036	29.6039	14.4329	-1.03643	0.0190384
ENPP6	4:39028666-39055624	8.85884	2.1594	-2.03649	0.00118002
ENPP4	3:109323128-109327586	4.09931	10.2991	1.32907	0.0263636
Enpp2	2:136104591-136163574	8.56101	2.69889	-1.66541	0.00214311
ENOX1	1:166088090-166385249	8.83794	3.5112	-1.33175	0.00826406
EMILIN3	20:5314291-5324952	3.19351	0.415407	-2.94255	0.00118002
EMCN	4:59791982-59835703	14.7218	33.2485	1.17534	0.00214311
EMC3	12:2749643-2799644	12.4609	35.8333	1.52389	0.0171702
ELN	19:785548-804855	22.5057	73.7406	1.71217	0.00118002
EIF4EBP1	22:2245548-2249847	326.367	768.163	1.23492	0.0104667
EIF1B	2:44557273-44561335	15.2714	33.6785	1.141	0.0194823
EGLN3	5:34984450-35009673	15.6477	3.7225	-2.07161	0.00118002
EGLN1	3:39053931-39084651	56.4914	274.515	2.28078	0.00118002
EGFL6	1:122466940-122507987	66.5384	18.6502	-1.835	0.00118002
EF1A	20:9348413-9360272	420.297	1126.14	1.4219	0.0176848
ECT2	9:18698708-18719419	5.09205	0.945192	-2.42957	0.00118002
ECI2	2:65994142-66009335	16.4368	73.2385	2.15567	0.00118002
ECI1	14:12305557-12310419	32.8038	67.0351	1.03105	0.0171702
E2F8	5:1710070-1846316	6.11969	1.35783	-2.17215	0.00118002
E2F7	1:38215230-38234268	2.01295	0.818975	-1.29742	0.031672
DYNLT3	1:112473716-112479027	31.1755	68.4417	1.13446	0.0109831
DYNLL2	19:8691043-8697672	28.3516	57.0521	1.00885	0.0203014
DUT	10:9639941-9649503	17.6209	8.57017	-1.03989	0.0260058
DUSP8	5:13542900-13564314	11.0031	22.6108	1.0391	0.046043
DUSP19	7:2200719-2207177	4.93327	11.7596	1.25322	0.031672
DUSP1	13:8380375-8384764	5.18711	25.3728	2.29028	0.00118002
DUPD1	6:14456095-14541652	9.42245	31.2669	1.73046	0.0482066
DSP	2:64611441-64640267	0.549436	0.161677	-1.76484	0.0491897
DSCC1	2:136256810-136267623	4.30366	1.02502	-2.06991	0.0076143
DPY19L3	11:9258356-9284701	8.73691	4.1684	-1.06763	0.0443872
DPP6	2:7411563-7635852	1.36862	0.258245	-2.4059	0.0252177
DNM3	8:4514808-4678962	2.63902	6.05454	1.19801	0.0423686
DNASE1L3	12:8921004-8924545	2.97358	12.1225	2.02742	0.00641661
DNAJC15	1:166031301-166055788	26.8661	85.8393	1.67585	0.00118002
DNAJC11	21:536663-551506	19.4956	43.5775	1.16044	0.0076143
DNAJB9	1:28382859-28392521	7.98325	33.874	2.08513	0.00118002
DNAJA4	10:3237427-3243990	34.2654	155.566	2.1827	0.00118002
DNAH7	7:9174694-9279054	0.586309	0.147378	-1.99214	0.015395
DNAH10	15:4855483-4908313	0.886602	0.0981922	-3.1746	0.00118002
DLST	5:37370863-37384872	63.6987	181.427	1.51005	0.00118002
DLGAP5	5:56134599-56152967	19.3916	7.60694	-1.35005	0.00443086
DLGAP2	3:90624219-91037359	2.10085	0.227007	-3.21016	0.00512235
DLD	1:14666133-14679885	91.9759	281.462	1.61361	0.00118002
DKK3	5:7580063-7602305	49.0509	19.4269	-1.33623	0.00371511
DIAPH3	1:161696599-161932705	7.46563	2.03834	-1.87287	0.00118002
DHRS7C	18:93472-103132	82.388	168.701	1.03396	0.0267986
DHRS7B	14:4530041-4539465	16.6246	37.3489	1.16774	0.00702696
DGAT2	1:193951673-193966948	12.4699	1.50204	-3.05345	0.00118002
DFNA5	2:31737211-31765198	6.91548	2.27295	-1.60526	0.00118002
DEPDC1	8:27684060-27694395	4.48238	0.61782	-2.85901	0.00296991
DENND4A	10:17584575-17628407	12.4684	29.0309	1.21931	0.00443086
DECR1	2:124172882-124182569	111.997	302.547	1.4337	0.00577906
DDX5	18:6859771-6865930	160.013	347.021	1.11683	0.0391645
DDAH1	8:15207027-15219475	2.32868	10.7326	2.20442	0.0427226
DD1	10:12243796-12252119	3.06567	0.918655	-1.73861	0.0242802
DCX	4:13192063-13262633	41.3293	6.39518	-2.69211	0.00118002
DCUN1D2	1:136728467-136751599	5.19246	11.4685	1.14319	0.00880977
DCTD	4:39453020-39473004	8.48163	2.47404	-1.77747	0.00371511
DCLK3	2:46489571-46501336	8.18782	1.39649	-2.55167	0.00118002
DCLK1	1:172004086-172233561	2.30116	0.614815	-1.90413	0.0232224
DBNDD2	20:5446692-5453177	27.2358	82.6338	1.60123	0.00118002
DBN1	13:9478587-9483755	4.62971	1.41675	-1.70833	0.039457
DBI	7:27884290-27887633	120.15	279.287	1.21691	0.0203014
DAPK2	10:3366147-3406151	14.7003	36.0176	1.29285	0.0124848
DAP	2:78115687-78159642	56.9681	27.1887	-1.06715	0.0167542
Dab1	8:24753890-24842483	2.56688	0.64114	-2.00131	0.0185564
CYR61	8:15135793-15137430	3.87534	56.6249	3.86904	0.00118002
CYP7B1	2:114093262-114114645	13.8509	5.29492	-1.3873	0.0120027
CYP27C1	7:23153214-23170059	2.65988	0.335431	-2.98727	0.0124848
CYFIP2	13:10683471-10727449	4.36118	0.734633	-2.56962	0.00118002
CX3CL1	11:766211-773374	1.8979	4.10467	1.11286	0.0438326
CUL4A	1:136854215-136888547	23.2679	67.1264	1.52854	0.00118002
Cu	MT:8330-9014	3423.72	11375.4	1.73228	0.0346984
CTGF	3:56638963-56641934	8.29119	67.8785	3.0333	0.00118002
CTDSP1	7:22043809-22046096	4.82507	12.638	1.38914	0.0324476
CSRP2	1:38160284-38171384	10.3637	3.46175	-1.58197	0.00118002
CSF1R	13:12594406-12611465	12.5831	6.0417	-1.05846	0.0242802
CRTAP	2:45056086-45077469	47.9782	16.9555	-1.50063	0.00118002
CRISPLD2	11:16374570-16399831	3.48517	10.0853	1.53296	0.0076143
CRISPLD1	2:118186851-118223238	15.9304	5.80403	-1.45666	0.00826406
CRHR2	2:4196305-4292028	5.67916	12.465	1.13413	0.0232224
CREM	2:12930881-12960732	3.45657	11.5713	1.74314	0.0239204
CREM	2:12930881-12960732	5.83284	25.542	2.1306	0.0114831
CREG1	1:90955205-90960077	11.333	36.8118	1.69964	0.00118002
CRB1	8:2476867-2538304	2.96326	0.277902	-3.41454	0.00118002
CRAT	17:5496165-5505914	52.0067	200.151	1.94432	0.00118002
CPZ	4:80746267-80784359	21.1498	5.97115	-1.82456	0.00296991
CPZ	4:80746267-80784359	6.35618	0.994891	-2.67555	0.00118002
CPS1	7:2785929-2886932	4.33533	1.48631	-1.5444	0.0114831
CPNE2	11:665608-694761	4.53419	0.937938	-2.27328	0.0375131
CPM	1:35273570-35305258	31.6318	72.789	1.20235	0.0104667
CPEB3	6:20399920-20475228	16.6327	34.2568	1.04236	0.0140201
CPE	4:23336495-23382106	5.04523	1.96542	-1.36008	0.00880977
COX7A2L	3:23089561-23277253	9.42345	20.1408	1.09579	0.00998534
COX6C	2:128069938-128075639	391.974	1244.48	1.66672	0.00118002
COX6A1	15:9297229-9298519	321.513	1091.5	1.76336	0.00118002
COX5A	10:1890519-1896138	42.2443	146.138	1.7905	0.00118002
COX4I1	11:17077533-17081626	533.729	1407.23	1.39868	0.00443086
COX19	14:2234034-2236026	6.86256	15.985	1.2199	0.0303998
COX10	18:2569644-2666638	7.69204	20.3194	1.40142	0.00214311
COTL1	11:16284724-16301412	190.094	74.0791	-1.35957	0.00296991
CORO2B	10:18699924-18729841	2.54469	0.987635	-1.36544	0.0219886
COQ9	11:566403-572627	44.6176	121.207	1.44179	0.00118002
COQ7	14:8470599-8473564	23.6546	51.1155	1.11164	0.0171702
COQ5	15:9281712-9287429	25.5714	58.2579	1.18792	0.00512235
COQ10B	7:9709226-9719149	11.5149	99.5738	3.11227	0.00118002
COL9A3	20:8689082-8720874	5.84561	2.58389	-1.17781	0.0466603
COL4A6	4:13941225-14074464	22.9702	56.8537	1.30749	0.00938095
COL4A5	4:13861295-13934946	33.4517	83.6483	1.32226	0.0135617
COL24A1	8:14987157-15097242	5.58523	2.07301	-1.42989	0.00641661
COL23A1	13:13578333-13606087	12.2514	4.33407	-1.49915	0.0167542
COL22A1	2:144142254-144374426	11.442	2.87485	-1.99278	0.00118002
COL21A1	3:86631542-86708701	9.21155	3.25134	-1.50241	0.00296991
COL20A1	20:9169384-9212722	73.6245	9.76916	-2.91388	0.00118002
col14A1	2:136370295-136490384	107.484	9.55897	-3.49113	0.00118002
col14A1	2:136370295-136490384	89.0962	7.58896	-3.55339	0.00118002
CNR1	3:75580392-75593814	26.221	2.74094	-3.25798	0.00118002
CNKSR2	1:118627849-118816669	12.8138	6.39793	-1.00202	0.0283204
CMTM3	11:10894385-10903372	44.39	16.9587	-1.38821	0.00826406
CMSS1	1:83998000-84011973	8.80298	34.7382	1.98046	0.00118002
CLYBL	1:143567592-143593342	3.08881	11.9959	1.95742	0.015395
CLUH	19:9468366-9499413	38.3409	85.238	1.15261	0.0158235
CLSTN2	9:5566976-5861817	5.43071	0.994562	-2.44901	0.00118002
CLPX	10:17224371-17244650	30.8787	116.191	1.91182	0.00118002
CLOCK	4:64696006-64717393	13.3784	33.0718	1.3057	0.00118002
CLMN	5:45165016-45184249	3.27502	9.3174	1.50842	0.00577906
CLK4	13:13446390-13454101	7.60782	16.8461	1.14686	0.0135617
CLIP4	3:8094159-8408079	12.3629	45.0293	1.86484	0.00118002
CLIP1	15:5810439-5862422	28.0223	79.5608	1.50548	0.00118002
CLEC19A	14:8410447-8412755	45.0566	8.46154	-2.41275	0.00826406
CLCN1	1:77089394-77125849	1.02977	27.327	4.72993	0.00118002
CLASP2	2:45255769-45389575	154.885	49.6621	-1.64098	0.00118002
CKAP4	1:53861782-53873170	98.5611	49.0523	-1.0067	0.0309761
CKAP2	1:169701517-169710954	30.3261	4.44475	-2.77039	0.00118002
CIT	15:9566083-9635653	4.80403	1.83947	-1.38496	0.00512235
CISH	12:1831237-1832110	3.28744	30.9609	3.23541	0.00118002
CISD1	6:4716455-4723609	21.2694	52.814	1.31214	0.0290925
CIDEA	2:97144111-97156128	16.7475	6.55607	-1.35304	0.0167542
CHSY1	10:17041537-17094017	16.2297	7.42312	-1.12854	0.0303998
CHP1	5:23819874-23836825	16.1741	56.8812	1.81427	0.00118002
CHKA	5:15504201-15524926	9.01627	4.25801	-1.08235	0.0375131
CHDH	12:7206944-7220366	15.0143	3.04237	-2.30306	0.00118002
CHCHD3	1:1988188-2096646	95.7689	253.122	1.4022	0.00214311
CHCHD2	19:4902070-4904224	536.798	1414.04	1.39737	0.0076143
CHCHD10	15:7969261-7970528	48.6771	424.771	3.12537	0.00118002
CHAF1B	1:106039839-106057388	7.66733	2.9851	-1.36094	0.0171702
CHAD	18:10612486-10648347	7.59648	28.9043	1.92788	0.00371511
CHAC1	5:23730411-23732558	0.472737	16.3766	5.11446	0.00118002
CEP95	18:6870497-6883021	5.87003	2.41014	-1.28425	0.0267986
CEP55	6:19961894-19974521	5.65946	1.75183	-1.6918	0.0403209
CEP135	4:64533646-64563061	2.87847	0.947619	-1.60292	0.0190384
CENPW	3:59060254-59067195	4.86397	1.25145	-1.95853	0.0388956
CENPT	11:861023-877706	9.40441	2.85968	-1.71748	0.00296991
CENPL	8:5533681-5536458	2.92007	0.478657	-2.60894	0.0171702
CENPJ	1:178533779-178551434	2.10417	0.511359	-2.04084	0.00512235
CENPI	4:2058473-2072715	2.98784	0.551839	-2.43678	0.00371511
CENPF	3:20356019-20391564	17.2647	3.32478	-2.3765	0.00118002
CENPE	4:60597387-60634806	13.8719	2.5721	-2.43115	0.00118002
CELSR1	1:15539605-15697582	3.28348	1.36146	-1.27007	0.015395
CELF2	1:5715213-5839991	25.3203	10.8397	-1.22397	0.0176848
CECR5	1:61787547-61792304	4.02943	9.97124	1.3072	0.0473009
CEBPB	20:14054695-14055682	2.97674	15.6916	2.39818	0.00118002
CDK1	6:8142504-8170935	52.7764	8.4854	-2.63684	0.00118002
CDH7	2:95477060-95554752	7.05458	2.28831	-1.62428	0.0104667
CDH2	2:104449183-104562821	17.3805	5.97879	-1.53954	0.00118002
CDH11	11:11582883-11662192	41.5835	18.5694	-1.16308	0.00938095
CDCA7L	2:30690281-30698829	14.8683	6.47909	-1.19838	0.0320609
CDCA7	7:16830039-16838026	12.4587	3.78579	-1.71849	0.00118002
CDCA2	22:805746-813900	4.84057	1.36465	-1.82665	0.00214311
CDC45	15:664119-676502	7.98668	2.67704	-1.57696	0.00296991
CDC42EP3	3:31128988-31129744	46.4122	117.621	1.34157	0.00118002
CDC20	8:18577131-18582553	12.6028	2.36275	-2.41521	0.00118002
CD82	5:21271277-21305215	17.7351	6.35599	-1.48042	0.00214311
CD44	5:18248883-18303314	12.5264	5.31309	-1.23735	0.00443086
CD36	1:11005424-11038504	83.2384	363.35	2.12604	0.00118002
CD109	3:80775680-80855396	5.39782	11.7071	1.11694	0.0307119
CCR8L	2:43294541-43295675	10.0925	0.860921	-3.55126	0.00118002
CCPG1	10:7454664-7480656	13.8171	32.5741	1.23728	0.0274941
CCNF	14:14266618-14277925	4.36927	1.23727	-1.82024	0.0140201
CCNB3	4:1813108-1815939	8.91752	2.68799	-1.73012	0.0114831
CCNB2	10:6313606-6321500	19.5442	3.5084	-2.47785	0.00118002
CCNA2	4:53350908-53356114	18.256	6.80496	-1.42371	0.00371511
CCDC88A	3:52539-124600	15.3099	6.54905	-1.22511	0.00371511
CCDC37	12:10643107-10655423	0.354315	2.1987	2.63355	0.0130279
CCDC141	7:14582882-14641810	23.4454	9.3441	-1.32718	0.00214311
CCDC111	4:38931718-38947734	2.85972	0.852699	-1.74576	0.0354152
CCDC109B	4:57764088-57791851	7.63366	2.92291	-1.38497	0.0185564
CCBL1	17:5284709-5289952	1.51696	7.13545	2.23383	0.00443086
CBFB	11:2339680-2375869	38.9858	85.4226	1.13167	0.0203014
CAV3	12:19261584-19265022	129.477	53.6468	-1.27113	0.00702696
cat-1	1:174687110-174726955	12.1062	3.46108	-1.80645	0.00118002
CASS4	20:12336093-12351860	7.27548	0.569058	-3.67639	0.00118002
CASC5	5:920666-948755	6.68095	1.27205	-2.3929	0.00118002
CAND2	12:19444972-19459421	18.4816	62.7029	1.76244	0.00118002
CALCR	2:23188381-23325400	0.492109	3.13951	2.67349	0.0167542
CADPS	12:13138123-13311248	1.90743	0.297238	-2.68194	0.00296991
CAD	3:104164894-104174351	3.46302	1.26115	-1.45728	0.00641661
CACNA2D3	12:7310502-7722064	1.44732	0.261776	-2.46698	0.015395
CACNA1H	14:5230049-5338554	3.56203	0.403582	-3.14177	0.00118002
CA4	19:8096014-8104574	3.23174	29.254	3.17825	0.00118002
CA3	2:122552714-122568598	47.3596	108.307	1.19339	0.0488632
CA10	18:5124019-5286048	1.17811	0.309279	-1.92949	0.0336181
C9orf89	12:6621761-6639866	23.2548	51.2957	1.14131	0.0203014
C8orf4	22:2478969-2479900	20.4692	90.3642	2.1423	0.00118002
C8orf22	2:108189926-108193054	12.2743	346.046	4.81726	0.00118002
C7orf50	14:2275120-2298885	4.20715	25.854	2.61947	0.00118002
C7orf25	2:51738227-51742886	8.77508	22.5869	1.364	0.0076143
C5	17:8319162-8342836	0.99049	0.247096	-2.00307	0.0283204
C2H18ORF19	2:96482751-96500035	33.6166	73.0882	1.12047	0.0124848
C21H1ORF144	21:4372844-4385290	13.1482	26.9916	1.03765	0.0228282
C1S	1:76859358-76868459	1.56406	4.95685	1.66413	0.0163146
C1orf198	3:39856095-39877680	22.5039	8.52928	-1.39968	0.00118002
C1H11ORF67	1:192124319-192131944	3.88659	11.5696	1.57376	0.00443086
C17orf58	18:6962009-6967201	8.27918	2.19463	-1.91551	0.0076143
C15ORF23	5:792318-797351	13.3883	3.11857	-2.10201	0.00214311
C14orf105	5:55387428-55393814	0.444167	3.72227	3.06701	0.00938095
C11orf24	5:15656186-15661708	12.7024	4.13259	-1.61998	0.00118002
C10ORF58	6:3872163-3880487	14.0048	36.6056	1.38614	0.00641661
BUB1B	5:601358-621958	10.503	1.9888	-2.40083	0.00118002
BUB1	3:3037096-3057283	7.06033	1.15922	-2.60658	0.00118002
BTG1	1:44271337-44273899	93.4768	193.47	1.04943	0.0211297
BTBD11	1:53339866-53411487	9.23889	3.68958	-1.32426	0.00938095
BTBD1	10:10689549-10708346	47.3071	153.866	1.70155	0.00118002
BORA	1:155442014-155461540	3.34074	0.840658	-1.99058	0.0135617
BOC	1:82632010-82696983	10.8401	4.53282	-1.25789	0.00641661
BNIP3	6:34329836-34334530	37.3494	135.49	1.85902	0.00118002
BMP5	3:86766921-86825286	2.81292	1.0212	-1.46181	0.00641661
BMP4	5:58454253-58457967	2.48804	7.22525	1.53804	0.00880977
BIRC5	3:14764583-14765717	10.8119	2.03158	-2.41195	0.0211297
BHLHE40	12:18572198-18575093	4.90701	13.0862	1.41513	0.0194823
BEST3	1:35488977-35512697	0.345575	20.4827	5.88926	0.00118002
BEGAIN	5:48566384-48715173	1.85744	0.176473	-3.39579	0.0185564
BEAN1	11:10927994-10964663	17.3611	5.74481	-1.59553	0.0158235
BDH1	9:12115162-12127577	15.261	65.9084	2.11061	0.00118002
BCO1	11:14922968-14936617	0.805396	14.3845	4.15867	0.00118002
BCL6	9:14257891-14274166	23.6898	8.14905	-1.53956	0.00118002
BCL2	2:67926746-68013683	9.59154	21.061	1.13474	0.0109831
BCKDHB	3:78457901-78570667	15.5199	36.337	1.22732	0.00118002
BCHE	9:20419760-20464371	22.5478	4.51326	-2.32074	0.00118002
BCAS1	20:12728165-12763432	19.714	8.86795	-1.15255	0.0239204
BCAR3	8:12762343-12811978	4.39555	12.5894	1.5181	0.00296991
BBOX1	5:3526416-3559728	20.3854	47.478	1.21972	0.00702696
BASP1	2:75347265-75348000	57.6207	23.1147	-1.31778	0.00826406
BACH1	1:103417899-103443811	18.2319	37.8725	1.05468	0.0181164
B4GALT6	2:105840569-105864567	1.63797	0.302475	-2.43702	0.00702696
B4GALNT4	5:1572181-1591429	3.73749	1.02673	-1.86401	0.00118002
B3GNT9	11:2423733-2424981	15.1967	5.87791	-1.37038	0.0158235
AURKA	20:12364934-12370702	9.7124	1.99415	-2.28406	0.00443086
ATPAF1	8:20744186-20754041	5.87381	15.5486	1.40442	0.00118002
ATP6V1E1	1:61931082-61940679	13.7272	45.0862	1.71565	0.00118002
ATP6V0C	14:13906678-13908834	36.3972	73.9203	1.02214	0.0278982
ATP5J	1:101882850-101884143	153.688	382.763	1.31644	0.00118002
ATP5H	18:10897736-10900757	112.84	273.013	1.27468	0.00296991
ATP5G3	7:16150148-16153215	158.937	357.672	1.17018	0.00880977
ATP5C1	1:4144465-4151271	241.304	652.866	1.43593	0.00577906
ATP1B1	1:83178849-83189463	86.0757	201.039	1.2238	0.0124848
ATP10A	1:131038511-131149938	2.91431	7.49158	1.36211	0.00296991
ATF3	3:21184775-21188556	13.4353	76.5468	2.51031	0.00118002
ATAD5	18:6596438-6612865	6.58969	2.50892	-1.39315	0.00371511
ATAD1	6:9132222-9180808	16.5928	36.1386	1.12298	0.0410457
ASXL3	2:106537939-106707763	5.55454	2.68428	-1.04913	0.0271484
ASPM	8:2593759-2625649	19.9709	3.40468	-2.55231	0.00118002
ASNS	2:24791549-24805274	8.05105	3.39474	-1.24588	0.0181164
ASB4	2:24010592-24020518	0.319287	11.0058	5.10727	0.00118002
ASB18	7:5106114-5120043	7.15075	0.966147	-2.88778	0.00214311
ASB15	1:22059753-22075013	3.42372	14.6638	2.09862	0.00118002
ASB11	1:121483019-121494829	1.04492	12.2369	3.54977	0.00118002
ARNT2	10:11900895-11979084	4.63893	2.12598	-1.12566	0.0242802
ARHGAP40	20:4036300-4076622	14.0346	3.54764	-1.98406	0.00118002
ARHGAP25	22:291967-308523	4.99034	2.1897	-1.1884	0.031672
ARHGAP22	6:17831516-17965896	2.76023	0.89736	-1.62103	0.0466603
ARHGAP19	6:21907729-21926841	5.78609	1.64096	-1.81804	0.00118002
ARHGAP11A	5:29863999-29903672	4.37967	1.52598	-1.52108	0.0219886
APOO	1:117716972-117747598	19.9771	62.2028	1.63863	0.00118002
APOLD1	1:48049291-48049969	1.24333	8.52434	2.77738	0.0343965
APITD1	21:3730259-3733060	13.5145	4.06008	-1.73492	0.0198868
APBA2	10:5356026-5394968	3.24547	0.955304	-1.76439	0.0144396
AOX1	7:10696197-10732631	8.71396	27.4541	1.65562	0.00118002
ANLN	2:47314674-47343598	14.345	3.45412	-2.05415	0.00118002
ANKRD9	5:49550496-49551932	1.59233	15.5983	3.29217	0.00118002
ANKRD50	4:52293414-52334335	33.01	15.3859	-1.10129	0.0198868
ANKRD2	6:21863721-21866526	3.91994	87.8079	4.48545	0.00118002
ANKRD1	6:19193100-19202303	10.566	379.659	5.1672	0.00118002
ANKH	2:76201669-76237846	11.9842	34.0526	1.50663	0.00118002
ANGPTL5	1:182045780-182059847	1.68388	9.41819	2.48366	0.00118002
AMY1A	8:10001374-10007677	35.7998	110.257	1.62284	0.00118002
AMPD3	5:8361713-8387323	51.9449	24.8112	-1.06599	0.0207099
AMER3	9:2036681-2039627	1.78466	6.36623	1.83479	0.00118002
ALPK3	10:380305-419904	46.0695	161.303	1.80789	0.00118002
ALOX5	6:17175763-17201028	4.05704	1.64076	-1.30607	0.0144396
ALDOC	19:5734739-5737598	303.233	146.909	-1.0455	0.03015
ALDH6	10:16932374-16967360	22.7978	9.81909	-1.21524	0.00371511
ALDH5A1	2:57896209-57908296	12.7655	33.2629	1.38166	0.00118002
ALDH4A1	21:4543829-4553081	4.47969	9.50812	1.08576	0.0224108
ALCAM	1:85893283-86010821	6.03353	14.5065	1.26563	0.00443086
ALB	4:50253144-50269174	4.24674	0.313032	-3.76197	0.00118002
AKAP12	3:48114481-48136195	137.16	58.8971	-1.21959	0.0235742
AIMP2	14:974576-976558	28.4272	59.0841	1.0555	0.0198868
AIFM1	4:1555731-1567433	40.1798	80.5317	1.00309	0.0278982
AHSG	9:15608665-15615228	42.9551	18.5498	-1.21143	0.0215793
AHCY	20:1601527-1862123	132.728	46.393	-1.5165	0.0414599
AGRN	21:2708870-2772320	7.413	3.08158	-1.26639	0.0158235
AGPAT2	17:7737253-7744146	10.869	28.9172	1.41171	0.0130279
AGL	8:11017202-11051067	98.685	275.034	1.47871	0.0158235
AGBL1	10:13154343-13445021	12.782	29.5136	1.20726	0.00826406
AFF3	1:132026146-132299346	8.16274	3.51125	-1.21707	0.0124848
AFAP1L1	13:7864572-7883261	17.5805	5.95623	-1.56151	0.00118002
AFAP1	4:80111130-80222324	23.3447	9.81964	-1.24935	0.0194823
ADSSL1	5:51448055-51473869	95.3603	314.822	1.72308	0.00118002
ADPRH	1:91610620-91612619	4.69243	13.2199	1.4943	0.046996
ADM	5:8423160-8425797	3.387	9.66455	1.51269	0.0185564
ADIPOR2	1:61067943-61110429	10.9582	25.6196	1.22523	0.0274941
ADIPOQ	9:4729435-4731573	36.7673	114.485	1.63866	0.00118002
ADHFE1	2:114787386-114799160	5.13792	14.0091	1.44711	0.0076143
ADGRG1	11:529482-535232	4.32044	9.38242	1.11878	0.0369229
ADGRF5	3:109500726-109534703	2.67599	9.67832	1.85469	0.00118002
ADGRB1	2:147221607-147426587	1.33658	0.293634	-2.18645	0.00214311
ADCK3	3:11801156-11822257	107.997	661.199	2.6141	0.00118002
ADAMTSL2	17:6972900-6991273	1.17996	5.39031	2.19162	0.00214311
ADAMTS17	10:16601476-16763501	7.13792	3.00256	-1.24931	0.0158235
ADAMTS13	17:6906388-6925818	1.33424	3.81223	1.51461	0.0104667
ADAMTS1	1:102362465-102371203	12.8887	26.7056	1.05103	0.0167542
ADAM22	2:20749271-20857559	6.56292	2.79053	-1.2338	0.0167542
ADAM19	13:10642121-10680834	11.2028	3.50413	-1.67673	0.00512235
ADA	20:5699880-5727458	2.99269	9.9104	1.7275	0.0427226
ACYP2	3:2811631-2857436	24.1133	98.6751	2.03286	0.00296991
ACTR8	12:7223207-7230233	8.40341	17.9611	1.09583	0.0235742
ACSL4	4:13726221-13756750	5.49988	21.7751	1.98521	0.00118002
ACSL1	4:38883036-38919985	80.945	387.306	2.25846	0.00118002
ACRC	4:2169807-2177051	3.80582	0.788508	-2.27101	0.0144396
ACOT13	2:90244562-90249282	116.306	337.575	1.53729	0.00118002
ACOT11	8:24131386-24140486	1.9788	9.33809	2.2385	0.00118002
ACO2	1:49465616-49486042	218.532	948.572	2.11791	0.00296991
ACADS	15:9178196-9185762	34.6378	74.5829	1.1065	0.0171702
ACADL	7:2715470-2729321	181.532	593.875	1.70994	0.00118002
ACAD9	12:5186795-5234534	333.943	1137.5	1.76819	0.00577906
ACACB	15:6650608-6669926	3.5046	24.5543	2.80866	0.00118002
ABRA	2:130780628-130786003	22.3481	109.238	2.28925	0.00118002
ABR	19:6316684-6340981	1.85627	5.30828	1.51584	0.00641661
ABHD6	12:8930168-8940409	1.35787	6.60958	2.28321	0.00296991
ABHD5	2:41434127-41462705	8.07242	31.4147	1.96037	0.00118002
ABHD2	10:12480720-12504608	7.96327	21.5591	1.43686	0.00702696
ABCD2	1:15080339-15126895	5.25724	19.859	1.91742	0.00118002
ABCC5	9:15226941-15240733	28.9162	95.2486	1.71982	0.00118002
ABCC4	1:145358359-145506681	2.3333	16.0801	2.78483	0.00118002
ABCC1	14:7628433-7676063	7.40439	37.9521	2.35773	0.00118002
ABCB6	7:21731259-21735967	1.79808	5.22351	1.53856	0.0158235
ABCB1LB	2:20547213-20632812	0.663941	3.65781	2.46185	0.0290925
ABCB1LB	2:20547213-20632812	0.740948	5.90832	2.99531	0.00118002
AASS	1:22638790-22669004	13.3423	41.4403	1.63503	0.00118002
[2Fe-2S]	1:178819329-178835807	12.015	32.2436	1.42417	0.00118002
[2Fe-2S]	11:7596757-7603866	26.4925	90.4624	1.77173	0.00118002
-	16:16220-33713	6.06858	20.6475	1.76654	0.00214311
-	21:162037-170418	35.2502	98.9186	1.48861	0.00118002
-	13:4098317-4105100	2.58491	6.19773	1.26163	0.0381698
-	6:2134546-2155479	55.2466	115.182	1.05996	0.015395
-	6:2260606-2277212	32.3366	67.417	1.05994	0.039721
-	6:4591324-4620591	11.8668	28.8566	1.28197	0.00214311
-	8:3972198-3975333	73.012	217.988	1.57805	0.00118002
-	1:6582222-6603252	1.77288	0.52748	-1.74891	0.015395
-	10:3925575-3927300	0.255211	4.42055	4.11446	0.0391645
-	5:1614561-1615780	223.679	961.941	2.10452	0.00118002
-	18:8165775-8226132	4.39416	17.8156	2.01949	0.00118002
-	6:15465025-15479995	8.35478	2.39983	-1.79967	0.00214311
-	2:4706212-4774487	9.85761	23.3853	1.24629	0.00296991
-	4:2883212-2895243	11.9292	27.822	1.22173	0.00641661
-	4:4111909-4145007	11.3721	26.2345	1.20597	0.00512235
-	12:10764795-10775842	37.845	16.8184	-1.17006	0.00702696
-	6:18995047-19027653	3.41529	0.911909	-1.90505	0.00371511
-	15:8768959-8794948	1.60021	0.257632	-2.63487	0.0163146
-	9:11035308-11044835	5.07311	11.181	1.14011	0.0274941
-	4:6544159-6930385	6.66381	2.59994	-1.35787	0.0120027
-	17:4660791-4785977	3.58049	1.53662	-1.22039	0.0239204
-	4:8720203-8822178	1.37235	0.310208	-2.14534	0.0228282
-	6:21486150-21531654	1.26947	0.182495	-2.7983	0.0478467
-	13:16453955-16455280	59.0809	191.674	1.69789	0.00118002
-	5:16277081-16279506	5.79746	14.5702	1.32953	0.0198868
-	4:12862010-12864443	420.496	1275.87	1.60131	0.00118002
-	15:10907426-10923703	4.68137	39.2782	3.06872	0.00118002
-	10:19166390-19211028	6.97257	3.41173	-1.03119	0.0290925
-	2:19455260-19499773	2.11631	5.09879	1.2686	0.0235742
-	7:13288816-13298499	3.07167	1.01053	-1.60391	0.0239204
-	3:16102968-16135926	34.0836	97.2641	1.51283	0.00118002
-	5:25031672-25127740	36.9474	14.0863	-1.39117	0.00214311
-	17:276901-284362	3.85043	0.650559	-2.56527	0.0163146
-	4:19815639-19863379	9.77515	19.9388	1.02839	0.0309761
-	7:16842856-16940702	31.0782	73.0491	1.23296	0.00512235
-	7:17412086-17457269	33.2006	263.721	2.98973	0.00118002
-	1:35529405-35552084	1.73277	5.37394	1.6329	0.015395
-	2:26752973-26765336	5.71554	1.81886	-1.65186	0.0076143
-	4:45133424-45138549	3.41076	12.6206	1.88762	0.00214311
-	1:47926958-48009693	157.96	39.3596	-2.00478	0.00371511
-	7:27688523-27704865	16.4474	5.06418	-1.69946	0.00938095
-	2:47875371-47923403	24.4897	11.7396	-1.0608	0.0104667
-	4:59594469-59604806	3.34522	0.484535	-2.78743	0.0144396
-	1:48017423-48018082	52.7009	5.4564	-3.27181	0.00118002
-	4:80001880-80095152	13.5133	5.4238	-1.317	0.00938095
-	2:122584149-122599722	0.80309	100.088	6.9615	0.00118002
-	2:124071733-124090805	1.89337	11.9112	2.65328	0.00118002
-	1:104962791-104966121	566.884	1526.61	1.42921	0.0104667
-	1:109004382-109023587	0.321198	4.31362	3.74736	0.0104667
-	1:109034822-109059060	4.39979	18.9605	2.10749	0.00118002
-	1:115176850-115211780	5.29954	40.6995	2.94107	0.00118002
-	1:137992923-137995864	1.26026	6.44881	2.35532	0.00118002
-	1:141986529-142004203	0	7.64335	3.11159	0.00118002
-	1:173863588-174002319	26.0696	53.1488	1.02767	0.0453907
-	1:179738879-179741023	222.482	59.8804	-1.89354	0.00118002
-	2:97952711-97956997	2.59846	14.4331	2.47365	0.00118002
-	2:94088924-94213373	7.00735	1.9328	-1.85818	0.0109831
-	2:88939277-88971402	6.61295	2.48337	-1.413	0.039457
-	4:28711204-28731295	3.92385	59.4334	3.92093	0.00118002
-	4:9508921-9512126	10.5681	24.935	1.23845	0.00880977
-	4:9265342-9277040	8.26113	35.7807	2.11477	0.00118002
-	4:2122994-2142344	0.498276	3.96712	2.99308	0.00118002
-	8:19315963-19319691	0.656338	2.71123	2.04644	0.0224108
-	9:10087483-10088628	0.687282	10.1426	3.88338	0.00880977
-	11:7214480-7219185	5.90578	1.48721	-1.98952	0.0271484
-	8:118969-130833	4.71109	0	-2.51377	0.00118002
-	14:1037359-1043904	73.7247	7.69384	-3.26037	0.00118002
-	5:54839245-54849270	1.95032	9.30085	2.25365	0.00371511
-	1:62201005-62210709	2.72891	14.8525	2.44431	0.00118002
-	3:29668179-29669945	17.742	5.17513	-1.7775	0.0190384
-	5:25458304-25463132	11.9075	66.7764	2.48747	0.00118002
-	20:10135194-10138155	6.07917	0.852844	-2.83352	0.00577906
-	6:19469699-19481511	2.1892	0.694204	-1.65698	0.039457
-	1:49022099-49029093	0.10623	1.01888	3.26173	0.0198868
-	1:48010461-48011912	54.3324	11.7638	-2.20746	0.00118002
-	18:7577908-7590495	6.26024	1.51447	-2.04741	0.00641661
-	4:79582075-79997954	19.3639	6.3889	-1.59973	0.0274941
-	1:170503130-170504264	3.51912	0.778257	-2.1769	0.0417648
-	3:60435281-60455791	102.045	232.909	1.19055	0.00702696
-	3:53787118-53797292	2.50864	8.07536	1.68662	0.00371511
-	2:110274737-110448865	0.213467	0.803809	1.91284	0.0427226
-	19:5741147-5746743	2.43063	0.484154	-2.32779	0.0420677
-	2:78899837-78901559	66.2157	24.2718	-1.44789	0.0232224
-	14:8611060-8624762	5.76162	0.743484	-2.9541	0.0109831
-	13:2832798-2846286	0.674854	0.165094	-2.03129	0.0211297
-	1:54456460-54481638	12.0069	3.59968	-1.73792	0.00118002
-	12:11575287-11580696	5.78643	13.9567	1.27021	0.00118002
-	2:8080090-8183222	20.4223	71.534	1.80848	0.00296991
-	2:66376323-66400743	47.4538	6.08837	-2.96239	0.00118002
-	22:2781447-2787337	1.54615	14.0526	3.18408	0.0109831
2016-09-02	9:4480808-4499952	19.7026	5.74759	-1.77735	0.00118002
10	15:5297890-5339287	69.534	265.552	1.9332	0.00118002
